# Supplementary material for: Plants of the Genus Zingiber: A Review of Their Ethnomedicine, Phytochemistry and Pharmacology
Source: MDPI journal article supplement (doi:10.3390/molecules27092826), 2022-04-29
Supplement: s1 [file s1]

# Plants of the Genus *Zingiber*: A Review of Their Ethnomedicine, Phytochemistry and Pharmacology

Miao Deng <sup>1</sup>, Xuan Yun <sup>2</sup>, Shurui Ren <sup>1</sup>, Zhixing Qing <sup>2,\*</sup> and Fenglian Luo <sup>1,\*</sup>
<sup>1</sup> College of Food Science and Technology, Hunan Agricultural University, Changsha 410128, China; dengmiao1999@163.com (M.D.); zsb@hunau.net (S.R.)

<sup>2</sup> Hunan Co-Innovation Center for Utilization of Botanical Functional Ingredients, College of Veterinary Medicine, Hunan Agricultural University, Changsha 410128, China; zengjianguo@hunau.edu.cn

\* Correspondence: qingzhixing@hunau.edu.cn (Z.Q.); luofenglian@hunau.edu.cn (F.L.); Tel: +86-134-6771-5114 (Z.Q. &amp; F.L.); Fax: +86-0731-8461-7093 (Z.Q. &amp; F.L.)

**Table S1.** A comprehensive list of chemical constituents of *Zingiber* plants.

| No.                  | Compounds                             | Formula                                        | MW     | Sources              | References |
|----------------------|---------------------------------------|------------------------------------------------|--------|----------------------|------------|
| <i>Volatile oils</i> |                                       |                                                |        |                      |            |
| 1                    | Zerumbone                             | C <sub>16</sub> H <sub>24</sub> O              | 232.18 | <i>Z. zerumbet</i>   | [77]       |
| 2                    | Eugenyl acetate                       | C <sub>12</sub> H <sub>14</sub> O <sub>3</sub> | 206.09 | <i>Z. zerumbet</i>   | [85]       |
| 3                    | β-elemenone                           | C <sub>15</sub> H <sub>22</sub> O              | 218.17 | <i>Z. zerumbet</i>   | [85]       |
| 4                    | 2-nonanone                            | C <sub>9</sub> H <sub>18</sub> O               | 142.14 | <i>Z. zerumbet</i>   | [87]       |
|                      |                                       |                                                |        | <i>Z. officinale</i> | [88]       |
| 5                    | 2-heptanol acetate                    | C <sub>11</sub> H <sub>22</sub> O <sub>2</sub> | 186.16 | <i>Z. zerumbet</i>   | [87]       |
|                      |                                       |                                                |        | <i>Z. officinale</i> | [89]       |
| 6                    | 1,5-heptadiene                        | C <sub>7</sub> H <sub>12</sub>                 | 96.09  | <i>Z. zerumbet</i>   | [87]       |
| 7                    | Lavandulyl acetate                    | C <sub>10</sub> H <sub>16</sub> O <sub>2</sub> | 168.12 | <i>Z. zerumbet</i>   | [87]       |
| 8                    | Eugenol                               | C <sub>10</sub> H <sub>12</sub> O <sub>2</sub> | 164.08 | <i>Z. zerumbet</i>   | [87]       |
| 9                    | trans-isoeugenol                      | C <sub>10</sub> H <sub>12</sub> O <sub>2</sub> | 164.08 | <i>Z. officinale</i> | [90]       |
| 10                   | Cyclohexanemethanol                   | C <sub>7</sub> H <sub>14</sub> O               | 114.10 | <i>Z. zerumbet</i>   | [87]       |
| 11                   | Methyl salicylate                     | C <sub>8</sub> H <sub>8</sub> O <sub>3</sub>   | 152.05 | <i>Z. zerumbet</i>   | [91]       |
| 12                   | β-sinensal                            | C <sub>15</sub> H <sub>22</sub> O              | 218.17 | <i>Z. zerumbet</i>   | [85]       |
| 13                   | Cinereone                             | C <sub>10</sub> H <sub>14</sub> O              | 150.10 | <i>Z. zerumbet</i>   | [92]       |
| 14                   | Phytone                               | C <sub>17</sub> H <sub>34</sub> O              | 254.26 | <i>Z. zerumbet</i>   | [92]       |
|                      |                                       |                                                |        | <i>Z.</i>            |            |
| 15                   | Methy leugenol                        | C <sub>11</sub> H <sub>14</sub> O <sub>2</sub> | 178.10 | <i>corallinum</i>    | [83]       |
|                      |                                       |                                                |        | <i>Hance</i>         |            |
|                      |                                       |                                                |        | <i>Z. officinale</i> | [81]       |
|                      |                                       |                                                |        | <i>Z.</i>            |            |
| 16                   | c-3,4 -dimethoxy cinnamyl aldehyde    | C <sub>11</sub> H <sub>12</sub> O <sub>3</sub> | 192.08 | <i>corallinum</i>    | [83]       |
|                      |                                       |                                                |        | <i>Hance</i>         |            |
|                      |                                       |                                                |        | <i>Z.</i>            |            |
| 17                   | Methyl iso-eugenol                    | C <sub>11</sub> H <sub>14</sub> O <sub>2</sub> | 178.10 | <i>corallinum</i>    | [83]       |
|                      |                                       |                                                |        | <i>Hance</i>         |            |
|                      |                                       |                                                |        | <i>Z.</i>            |            |
| 18                   | t-3,5-dimethoxy alkyne cinnaldehyde   | C <sub>11</sub> H <sub>10</sub> O <sub>3</sub> | 190.06 | <i>corallinum</i>    | [83]       |
|                      |                                       |                                                |        | <i>Hance</i>         |            |
|                      |                                       |                                                |        | <i>Z.</i>            |            |
| 19                   | Apiol                                 | C <sub>12</sub> H <sub>14</sub> O <sub>4</sub> | 222.09 | <i>corallinum</i>    | [83]       |
|                      |                                       |                                                |        | <i>Hance</i>         |            |
|                      |                                       |                                                |        | <i>Z.</i>            |            |
| 20                   | 3-methoxy -4-hydroxy methyl cinnamate | C <sub>10</sub> H <sub>10</sub> O <sub>4</sub> | 194.10 | <i>corallinum</i>    | [83]       |
|                      |                                       |                                                |        | <i>Hance</i>         |            |

|    |                                                |                                                |        |                           |      |
|----|------------------------------------------------|------------------------------------------------|--------|---------------------------|------|
| 21 | 3,4-dimethoxybenzaldehyde                      | C <sub>9</sub> H <sub>10</sub> O <sub>3</sub>  | 166.06 | Z.<br>corallinum<br>Hance | [93] |
| 22 | Methyl ferulate                                | C <sub>11</sub> H <sub>12</sub> O <sub>4</sub> | 208.07 | Z.<br>corallinum<br>Hance | [94] |
| 23 | Sabinen                                        | C <sub>10</sub> H <sub>18</sub>                | 138.14 | Z.<br>corallinum<br>Hance | [94] |
| 24 | Myristicin                                     | C <sub>11</sub> H <sub>12</sub> O <sub>3</sub> | 192.08 | Z.<br>corallinum<br>Hance | [94] |
| 25 | 1,4-bis(methoxy)-triquinacene                  | C <sub>12</sub> H <sub>14</sub> O <sub>2</sub> | 190.10 | Z.<br>corallinum<br>Hance | [95] |
| 26 | 1,4,7-tris(methoxy)-triquinacene               | C <sub>13</sub> H <sub>16</sub> O <sub>3</sub> | 220.11 | Z.<br>corallinum<br>Hance | [94] |
| 27 | Linalyl acetate                                | C <sub>13</sub> H <sub>22</sub> O <sub>2</sub> | 210.16 | Z.<br>corallinum<br>Hance | [78] |
| 28 | 2-allyl-1,4-dimethoxy-3-methyl-benzene         | C <sub>12</sub> H <sub>16</sub> O <sub>2</sub> | 192.12 | Z.<br>corallinum<br>Hance | [78] |
| 29 | 5-(4-methoxyphenyl)-2,4-pentadienoic acid      | C <sub>12</sub> H <sub>12</sub> O <sub>3</sub> | 204.08 | Z.<br>corallinum<br>Hance | [78] |
| 30 | 1-acetyl-2-(2,3,4-trimethoxyphenyl)-ethylene   | C <sub>13</sub> H <sub>16</sub> O <sub>4</sub> | 236.10 | Z.<br>corallinum<br>Hance | [78] |
| 31 | 5,7,8-trimethyl-6-coumarinyl ester-acetic acid | C <sub>14</sub> H <sub>14</sub> O <sub>4</sub> | 246.09 | Z.<br>corallinum<br>Hance | [78] |
| 32 | 2-naphthalenecarboxylic acid                   | C <sub>14</sub> H <sub>10</sub> O <sub>4</sub> | 250.12 | Z.<br>corallinum<br>Hance | [78] |
| 33 | Palmitic acid                                  | C <sub>16</sub> H <sub>32</sub> O <sub>2</sub> | 256.24 | Z.<br>corallinum<br>Hance | [96] |
|    |                                                |                                                |        | Z.<br>striolatum<br>Diels | [23] |
|    |                                                |                                                |        | Z. officinale             | [23] |
| 34 | 2,2,3-trimethyl-3-cyclopentene-1-acetaldehyde  | C <sub>10</sub> H <sub>16</sub> O              | 152.12 | Z.<br>striolatum<br>Diels | [84] |
| 35 | 4-isopropyl-2-cyclohexenyl-1-one               | C <sub>11</sub> H <sub>18</sub> O              | 166.14 | Z.<br>striolatum<br>Diels | [84] |
| 36 | Piperonyl alcohol                              | C <sub>8</sub> H <sub>8</sub> O <sub>3</sub>   | 152.05 | Z.<br>striolatum<br>Diels | [84] |
| 37 | p-isopropylphenol                              | C <sub>9</sub> H <sub>12</sub> O               | 136.09 | Z.<br>striolatum<br>Diels | [84] |

|    |                                      |                                                     |        |                                         |               |
|----|--------------------------------------|-----------------------------------------------------|--------|-----------------------------------------|---------------|
| 38 | 4-(1,3-Benzodioxol-5-yl) -2-butanone | C <sub>10</sub> H <sub>10</sub> O <sub>3</sub>      | 178.06 | Z.<br><i>striolatum</i><br>Diels        | [84]          |
| 39 | 1,3-p-Menthadien-7-al                | C <sub>10</sub> H <sub>14</sub> O                   | 150.10 | Z.<br><i>striolatum</i><br>Diels        | [84]          |
| 40 | Pentadecane                          | C <sub>15</sub> H <sub>32</sub>                     | 212.25 | Z.<br><i>striolatum</i><br>Diels        | [84]          |
| 41 | Tributyl phosphate                   | C <sub>12</sub> H <sub>27</sub> O <sub>4</sub><br>P | 266.16 | Z.<br><i>striolatum</i><br>Diels        | [84]          |
| 42 | Hexahydroaplotaxene 1-heptadecene    | C <sub>18</sub> H <sub>36</sub>                     | 252.28 | Z.<br><i>striolatum</i><br>Diels        | [84]          |
| 43 | Heptadecane                          | C <sub>18</sub> H <sub>38</sub>                     | 254.30 | Z.<br><i>striolatum</i><br>Diels        | [84]          |
| 44 | 4-isopropylbenzyl alcohol            | C <sub>10</sub> H <sub>14</sub> O                   | 150.10 | Z.<br><i>striolatum</i><br>Diels        | [84]          |
| 45 | Methyl 14-methylpentadecanoate       | C <sub>17</sub> H <sub>34</sub> O <sub>2</sub>      | 270.26 | Z.<br><i>striolatum</i><br>Diels        | [23]          |
| 46 | Methyl linolenate                    | C <sub>19</sub> H <sub>32</sub> O <sub>2</sub>      | 292.24 | Z.<br><i>striolatum</i><br>Diels        | [23]          |
| 47 | (Z)-docos-13-enamide                 | C <sub>22</sub> H <sub>43</sub> N                   | 337.33 | Z.<br><i>striolatum</i><br>Diels        | [23]          |
| 48 | 2-heptanol                           | C <sub>7</sub> H <sub>16</sub> O                    | 116.12 | Z. <i>officinale</i>                    | [81]          |
| 49 | 6-methyl-5-hepten-2-one              | C <sub>8</sub> H <sub>14</sub> O                    | 126.10 | Z. <i>officinale</i>                    | [81]          |
| 50 | Octanal                              | C <sub>8</sub> H <sub>16</sub> O                    | 128.12 | Z. <i>officinale</i>                    | [81]          |
| 51 | Rosefuran epoxide                    | C <sub>10</sub> H <sub>14</sub> O <sub>2</sub>      | 166.10 | Z. <i>officinale</i>                    | [81]          |
| 52 | Decanal                              | C <sub>10</sub> H <sub>20</sub> O                   | 156.15 | Z. <i>officinale</i>                    | [86]          |
| 53 | 2-Octenal                            | C <sub>8</sub> H <sub>14</sub> O                    | 126.10 | Z. <i>officinale</i>                    | [24]          |
| 54 | 1-cyclopropylpentane                 | C <sub>8</sub> H <sub>16</sub>                      | 112.13 | Z. <i>officinale</i>                    | [24]          |
| 55 | 2-undecanone                         | C <sub>11</sub> H <sub>22</sub> O                   | 170.17 | Z. <i>officinale</i>                    | [24]          |
| 56 | 4-(1-methoxyethyl)phenol             | C <sub>9</sub> H <sub>12</sub> O <sub>2</sub>       | 152.08 | Z. <i>officinale</i>                    | [99]          |
| 57 | Furfural                             | C <sub>5</sub> H <sub>4</sub> O <sub>2</sub>        | 96.02  | Z. <i>officinale</i>                    | [88]          |
| 58 | Benzaldehyde                         | C <sub>7</sub> H <sub>6</sub> O                     | 106.04 | Z. <i>officinale</i>                    | [88]          |
| 59 | Phenylacetaldehyde                   | C <sub>8</sub> H <sub>8</sub> O                     | 120.06 | Z. <i>officinale</i>                    | [88]          |
| 60 | Cuminaldehyde                        | C <sub>10</sub> H <sub>12</sub> O                   | 148.09 | Z. <i>officinale</i>                    | [88]          |
| 61 | 3-butylfuranbutanal                  | C <sub>7</sub> H <sub>14</sub> O                    | 114.10 | Z. <i>officinale</i>                    | [102]         |
| 62 | Methyl valeraldehyde                 | C <sub>6</sub> H <sub>12</sub> O                    | 100.09 | Z. <i>officinale</i>                    | [102]         |
| 63 | Alpha,P-dimethylstyrene              | C <sub>10</sub> H <sub>12</sub>                     | 132.09 | Z. <i>officinale</i>                    | [102]         |
| 64 | 3-(4-methylpent-3-enyl)furan         | C <sub>10</sub> H <sub>14</sub> O                   | 150.10 | Z. <i>officinale</i><br>Z. <i>mioga</i> | [102]<br>[82] |
| 65 | Dibutyl phthalate                    | C <sub>16</sub> H <sub>22</sub> O <sub>4</sub>      | 278.15 | Z. <i>officinale</i>                    | [102]         |
| 66 | Diisobutyl phthalate                 | C <sub>16</sub> H <sub>22</sub> O <sub>4</sub>      | 278.15 | Z. <i>officinale</i>                    | [103]         |
| 67 | oct-1-ene                            | C <sub>8</sub> H <sub>16</sub>                      | 112.13 | Z. <i>officinale</i>                    | [104]         |
| 68 | 2-hexenal, 2-ethyl-                  | C <sub>8</sub> H <sub>14</sub> O                    | 126.10 | Z. <i>officinale</i>                    | [104]         |
| 69 | 3,5-heptadiene-2-ol                  | C <sub>7</sub> H <sub>12</sub> O                    | 112.09 | Z. <i>officinale</i>                    | [104]         |
| 70 | 5-methyl-2(5H)-furanone              | C <sub>9</sub> H <sub>14</sub> O <sub>2</sub>       | 98.04  | Z. <i>officinale</i>                    | [104]         |
| 71 | Dodecanal                            | C <sub>12</sub> H <sub>24</sub> O                   | 184.18 | Z. <i>officinale</i>                    | [104]         |
| 72 | Pentadecanal                         | C <sub>15</sub> H <sub>30</sub> O                   | 226.23 | Z. <i>officinale</i><br>Z. <i>mioga</i> | [104]<br>[82] |

|                    |                                            |                                                |        |                                                                                                    |                                      |
|--------------------|--------------------------------------------|------------------------------------------------|--------|----------------------------------------------------------------------------------------------------|--------------------------------------|
| 73                 | 2,3,5,6-tetramethylphenol                  | C <sub>10</sub> H <sub>14</sub> O              | 150.10 | Z. officinale                                                                                      | [106]                                |
| 74                 | Vinylcyclohexane                           | C <sub>8</sub> H <sub>14</sub>                 | 110.11 | Z. officinale                                                                                      | [106]                                |
| 75                 | Isomethyleugenol                           | C <sub>11</sub> H <sub>14</sub> O <sub>2</sub> | 178.10 | Z. officinale                                                                                      | [106]                                |
| 76                 | 2-amino-7-methyl-1H-pteridin-4-one         | C <sub>7</sub> H <sub>7</sub> N <sub>5</sub> O | 177.07 | Z. officinale                                                                                      | [106]                                |
| 77                 | Carvacrol                                  | C <sub>10</sub> H <sub>14</sub> O              | 150.10 | striolatum<br>Diels<br>Z. mioga                                                                    | [84]<br>[82]                         |
| 78                 | Dodecanoic acid                            | C <sub>12</sub> H <sub>24</sub> O <sub>2</sub> | 200.18 | Z. officinale                                                                                      | [106]                                |
| 79                 | 1-(2-hydroxy-4,6-dimethoxy)acetophenone    | C <sub>10</sub> H <sub>12</sub> O <sub>4</sub> | 196.07 | Z. officinale                                                                                      | [106]                                |
| 80                 | 1-benzylindole                             | C <sub>15</sub> H <sub>13</sub> N              | 207.10 | Z. officinale                                                                                      | [106]                                |
| 81                 | Benzoic acid                               | C <sub>7</sub> H <sub>6</sub> O <sub>2</sub>   | 122.04 | Z. officinale                                                                                      | [60]                                 |
| 82                 | 2-decenol                                  | C <sub>10</sub> H <sub>20</sub> O              | 156.15 | Z. officinale                                                                                      | [107]                                |
| 83                 | 3-hydroxy-4-methoxymandelic Acid           | C <sub>9</sub> H <sub>10</sub> O <sub>5</sub>  | 198.05 | Z. officinale                                                                                      | [107]                                |
| 84                 | Ethyl (Z)-3-(4-methoxyphenyl)prop-2-enoate | C <sub>12</sub> H <sub>14</sub> O <sub>3</sub> | 206.09 | Z. officinale                                                                                      | [108]                                |
| 85                 | 4-(1-Methylethyl)-2-cyclohexen-1-one       | C <sub>9</sub> H <sub>14</sub> O               | 138.10 | Z. officinale                                                                                      | [109]                                |
| 86                 | Sec-butanol                                | C <sub>4</sub> H <sub>10</sub> O               | 74.07  | Z. officinale                                                                                      | [110]                                |
| 87                 | 1,1-dimethyl-2-butene                      | C <sub>6</sub> H <sub>12</sub>                 | 84.09  | Z. officinale                                                                                      | [110]                                |
| 88                 | 2-ethoxybutane                             | C <sub>6</sub> H <sub>14</sub> O               | 102.10 | Z. officinale                                                                                      | [110]                                |
| 89                 | 2-isopropoxyethanol                        | C <sub>5</sub> H <sub>12</sub> O <sub>2</sub>  | 104.08 | Z. officinale                                                                                      | [110]                                |
| 90                 | 2,4,5-trimethyl-1,3-dioxolane              | C <sub>6</sub> H <sub>12</sub> O <sub>2</sub>  | 116.08 | Z. officinale                                                                                      | [110]                                |
| 91                 | 2-ethoxypentane                            | C <sub>7</sub> H <sub>16</sub> O               | 116.12 | Z. officinale                                                                                      | [110]                                |
| 92                 | 1-propoxy-2-propanol                       | C <sub>6</sub> H <sub>14</sub> O <sub>2</sub>  | 118.10 | Z. officinale                                                                                      | [110]                                |
| 93                 | 2-methyl-3-phenylpropan-1-ol               | C <sub>10</sub> H <sub>14</sub> O              | 150.10 | Z. officinale                                                                                      | [80]                                 |
| 94                 | 1-phenylpropane-1,3-diol                   | C <sub>9</sub> H <sub>12</sub> O <sub>2</sub>  | 152.08 | Z. officinale                                                                                      | [80]                                 |
| 95                 | 2-pentylcyclopent-2-en-1-one               | C <sub>10</sub> H <sub>16</sub> O              | 152.12 | Z. officinale                                                                                      | [80]                                 |
| 96                 | 2-tridecanol                               | C <sub>13</sub> H <sub>28</sub> O              | 200.21 | Z. officinale                                                                                      | [80]                                 |
| 97                 | 2-Isopropenyl-5-methylhex-4-enylacetat     | C <sub>12</sub> H <sub>20</sub> O <sub>2</sub> | 196.15 | Z. officinale                                                                                      | [80]                                 |
| 98                 | Ethyl formate                              | C <sub>3</sub> H <sub>6</sub> O <sub>2</sub>   | 74.04  | Z. mioga                                                                                           | [82]                                 |
| 99                 | o-cymene                                   | C <sub>10</sub> H <sub>14</sub>                | 134.11 | Z. zerumbet<br>Z.<br>corallinum<br>Hance<br>Z. officinale                                          | [77]<br>[78]<br>[79]                 |
| 100                | m-cymene                                   | C <sub>10</sub> H <sub>14</sub>                | 134.11 | Z.<br>corallinum<br>Hance                                                                          | [78]                                 |
| 101                | p-cymene                                   | C <sub>10</sub> H <sub>14</sub>                | 134.11 | Z. zerumbet<br>Z.<br>corallinum<br>Hance<br>Z.<br>striolatum<br>Diels<br>Z. officinale<br>Z. mioga | [87]<br>[83]<br>[84]<br>[81]<br>[82] |
| 102                | p-cymen-8-ol                               | C <sub>10</sub> H <sub>14</sub> O              | 150.10 | Z. zerumbet<br>Z. officinale<br>Z. mioga                                                           | [91]<br>[79]<br>[82]                 |
| 103                | p-ethylcumene                              | C <sub>11</sub> H <sub>16</sub>                | 148.13 | Z. mioga                                                                                           | [82]                                 |
| 104                | 4-isopropylcyclohexanone                   | C <sub>9</sub> H <sub>16</sub> O               | 140.12 | Z. mioga                                                                                           | [82]                                 |
| 105                | 3-carene-10-al                             | C <sub>10</sub> H <sub>14</sub> O              | 150.10 | Z. mioga                                                                                           | [82]                                 |
| 106                | (E)-3-carene-2-ol                          | C <sub>10</sub> H <sub>16</sub> O              | 152.12 | Z. mioga                                                                                           | [82]                                 |
| <b>Monoterpene</b> |                                            |                                                |        |                                                                                                    |                                      |
| 107                | Myrtenyl acetate                           | C <sub>12</sub> H <sub>18</sub> O <sub>2</sub> | 194.13 | Z. zerumbet                                                                                        | [7]                                  |

|     |                                                            |                                   |        |                      |       |
|-----|------------------------------------------------------------|-----------------------------------|--------|----------------------|-------|
|     |                                                            |                                   |        | <i>Z. officinale</i> | [79]  |
|     |                                                            |                                   |        | <i>Z. mioga</i>      | [82]  |
| 108 | 3,6,6-Trimethyl-bicyclo[3.1.1]hept-2-ene                   | C <sub>10</sub> H <sub>16</sub>   | 136.13 | <i>Z. zerumbet</i>   | [92]  |
| 109 | Myrtenal                                                   | C <sub>10</sub> H <sub>14</sub> O | 150.10 | <i>Z. zerumbet</i>   | [92]  |
|     |                                                            |                                   |        | <i>Z. officinale</i> | [79]  |
|     |                                                            |                                   |        | <i>Z. mioga</i>      | [82]  |
|     |                                                            |                                   |        | <i>Z.</i>            |       |
| 110 | Myrtenol                                                   | C <sub>10</sub> H <sub>16</sub> O | 152.12 | <i>striolatum</i>    | [84]  |
|     |                                                            |                                   |        | <i>Diels</i>         |       |
|     |                                                            |                                   |        | <i>Z. officinale</i> | [81]  |
|     |                                                            |                                   |        | <i>Z. mioga</i>      | [82]  |
| 111 | (S)-cis-verbenol                                           | C <sub>10</sub> H <sub>16</sub> O | 152.12 | <i>Z. officinale</i> | [80]  |
| 112 | α-pinene                                                   | C <sub>10</sub> H <sub>16</sub>   | 136.13 | <i>Z. zerumbet</i>   | [77]  |
|     |                                                            |                                   |        | <i>Z.</i>            |       |
|     |                                                            |                                   |        | <i>corallinum</i>    | [78]  |
|     |                                                            |                                   |        | <i>Hance</i>         |       |
|     |                                                            |                                   |        | <i>Z.</i>            |       |
|     |                                                            |                                   |        | <i>striolatum</i>    | [84]  |
|     |                                                            |                                   |        | <i>Diels</i>         |       |
|     |                                                            |                                   |        | <i>Z. officinale</i> | [81]  |
|     |                                                            |                                   |        | <i>Z. mioga</i>      | [82]  |
| 113 | β-elemene                                                  | C <sub>15</sub> H <sub>24</sub>   | 204.19 | <i>Z. zerumbet</i>   | [7]   |
|     |                                                            |                                   |        | <i>Z.</i>            |       |
|     |                                                            |                                   |        | <i>corallinum</i>    | [78]  |
|     |                                                            |                                   |        | <i>Hance</i>         |       |
|     |                                                            |                                   |        | <i>Z.</i>            |       |
|     |                                                            |                                   |        | <i>striolatum</i>    | [84]  |
|     |                                                            |                                   |        | <i>Diels</i>         |       |
|     |                                                            |                                   |        | <i>Z. officinale</i> | [81]  |
|     |                                                            |                                   |        | <i>Z. mioga</i>      | [82]  |
|     |                                                            |                                   |        | <i>Z.</i>            |       |
| 114 | Carvopinone                                                | C <sub>10</sub> H <sub>14</sub> O | 150.10 | <i>striolatum</i>    | [84]  |
|     |                                                            |                                   |        | <i>Diels</i>         |       |
|     |                                                            |                                   |        | <i>Z.</i>            |       |
| 115 | z-pinocarveol                                              | C <sub>10</sub> H <sub>16</sub> O | 152.12 | <i>striolatum</i>    | [84]  |
|     |                                                            |                                   |        | <i>Diels</i>         |       |
|     |                                                            |                                   |        | <i>Z. mioga</i>      | [82]  |
| 116 | [(1S,4S,5S)-6,6-dimethyl-4-bicyclo[3.1.1]heptanyl]methanol | C <sub>10</sub> H <sub>18</sub> O | 154.14 | <i>Z. officinale</i> | [102] |
| 117 | δ-3-carene                                                 | C <sub>10</sub> H <sub>16</sub>   | 136.13 | <i>Z. zerumbet</i>   | [77]  |
|     |                                                            |                                   |        | <i>Z. officinale</i> | [79]  |
|     |                                                            |                                   |        | <i>Z. mioga</i>      | [82]  |
|     |                                                            |                                   |        | <i>Z.</i>            |       |
| 118 | Pinene oxide                                               | C <sub>10</sub> H <sub>16</sub> O | 152.12 | <i>corallinum</i>    | [83]  |
|     |                                                            |                                   |        | <i>Hance</i>         |       |
| 119 | α-cyclocitral                                              | C <sub>10</sub> H <sub>16</sub> O | 152.12 | <i>Z. officinale</i> | [80]  |
| 120 | α-terpinolene                                              | C <sub>10</sub> H <sub>18</sub>   | 138.14 | <i>Z. zerumbet</i>   | [87]  |
|     |                                                            |                                   |        | <i>Z.</i>            |       |
|     |                                                            |                                   |        | <i>corallinum</i>    | [96]  |
|     |                                                            |                                   |        | <i>Hance</i>         |       |
|     |                                                            |                                   |        | <i>Z. officinale</i> | [81]  |
|     |                                                            |                                   |        | <i>Z. mioga</i>      | [82]  |
|     |                                                            |                                   |        | <i>Z.</i>            |       |
| 121 | β-terpinene                                                | C <sub>10</sub> H <sub>16</sub>   | 136.13 | <i>corallinum</i>    | [94]  |
|     |                                                            |                                   |        | <i>Hance</i>         |       |
|     |                                                            |                                   |        | <i>Z. officinale</i> | [79]  |
|     |                                                            |                                   |        | <i>Z. mioga</i>      | [82]  |

|     |                                                        |                                                |        |                                                                                                                                                     |                                      |
|-----|--------------------------------------------------------|------------------------------------------------|--------|-----------------------------------------------------------------------------------------------------------------------------------------------------|--------------------------------------|
| 122 | 2-cyclohexen-1-ol, 1-methyl-4-(1-methylethyl)-, trans- | C <sub>10</sub> H <sub>18</sub> O              | 154.14 | Z.<br><i>corallinum</i><br><i>Hance</i>                                                                                                             | [78]                                 |
| 123 | trans-carveol                                          | C <sub>10</sub> H <sub>16</sub> O              | 152.12 | Z.<br><i>corallinum</i><br><i>Hance</i><br>Z.<br><i>striolatum</i><br><i>Diels</i><br>Z. <i>mioga</i>                                               | [78]<br>[84]<br>[82]                 |
| 124 | Carvone                                                | C <sub>10</sub> H <sub>14</sub> O              | 150.10 | Z.<br><i>striolatum</i><br><i>Diels</i><br>Z. <i>mioga</i>                                                                                          | [84]<br>[82]                         |
| 125 | Perillaldehyde                                         | C <sub>10</sub> H <sub>14</sub> O              | 150.10 | Z.<br><i>striolatum</i><br><i>Diels</i>                                                                                                             | [84]                                 |
| 126 | Limonene                                               | C <sub>10</sub> H <sub>16</sub>                | 136.13 | Z. <i>zerumbet</i><br>Z.<br><i>corallinum</i><br><i>Hance</i><br>Z.<br><i>striolatum</i><br><i>Diels</i><br>Z. <i>officinale</i><br>Z. <i>mioga</i> | [77]<br>[83]<br>[84]<br>[81]<br>[82] |
| 127 | Perillyl alcohol                                       | C <sub>10</sub> H <sub>16</sub> O              | 152.12 | Z.<br><i>striolatum</i><br><i>Diels</i>                                                                                                             | [84]                                 |
| 128 | Terpinen-4-ol                                          | C <sub>10</sub> H <sub>18</sub> O              | 154.14 | Z. <i>zerumbet</i><br>Z.<br><i>corallinum</i><br><i>Hance</i><br>Z.<br><i>striolatum</i><br><i>Diels</i><br>Z. <i>officinale</i>                    | [77]<br>[83]<br>[84]<br>[81]         |
| 129 | c-piperitol                                            | C <sub>10</sub> H <sub>18</sub> O              | 154.14 | Z.<br><i>corallinum</i><br><i>Hance</i>                                                                                                             | [83]                                 |
| 130 | Cumyl acetate                                          | C <sub>12</sub> H <sub>20</sub> O <sub>2</sub> | 196.15 | Z. <i>mioga</i>                                                                                                                                     | [82]                                 |
| 131 | β-phellandrene                                         | C <sub>10</sub> H <sub>16</sub>                | 136.13 | Z.<br><i>corallinum</i><br><i>Hance</i><br>Z.<br><i>striolatum</i><br><i>Diels</i><br>Z. <i>officinale</i><br>Z. <i>mioga</i>                       | [83]<br>[84]<br>[81]<br>[82]         |
| 132 | Dihydrocarveol                                         | C <sub>10</sub> H <sub>18</sub> O              | 154.14 | Z.<br><i>corallinum</i><br><i>Hance</i>                                                                                                             | [78]                                 |
| 133 | Isopulego                                              | C <sub>10</sub> H <sub>18</sub> O              | 154.14 | Z. <i>officinale</i><br>Z.                                                                                                                          | [106]                                |
| 134 | DL-menthol                                             | C <sub>10</sub> H <sub>20</sub> O              | 156.15 | <i>corallinum</i><br><i>Hance</i>                                                                                                                   | [93]                                 |
| 135 | Menthone                                               | C <sub>10</sub> H <sub>18</sub> O              | 154.14 | Z. <i>officinale</i>                                                                                                                                | [81]                                 |

|     |                                                      |                                                |        |                      |       |
|-----|------------------------------------------------------|------------------------------------------------|--------|----------------------|-------|
| 136 | Sylvestrene                                          | C <sub>10</sub> H <sub>16</sub>                | 136.13 | <i>Z. zerumbet</i>   | [92]  |
|     |                                                      |                                                |        | <i>Z.</i>            |       |
| 137 | Terpinyl acetate                                     | C <sub>12</sub> H <sub>20</sub> O <sub>2</sub> | 196.15 | <i>corallinum</i>    | [93]  |
|     |                                                      |                                                |        | <i>Hance</i>         |       |
| 138 | Bornyl acetate                                       | C <sub>12</sub> H <sub>20</sub> O <sub>2</sub> | 196.15 | <i>Z. zerumbet</i>   | [77]  |
|     |                                                      |                                                |        | <i>Z. officinale</i> | [81]  |
|     |                                                      |                                                |        | <i>Z. mioga</i>      | [82]  |
| 139 | Piperitenone                                         | C <sub>10</sub> H <sub>14</sub> O              | 150.10 | <i>Z. mioga</i>      | [82]  |
|     |                                                      |                                                |        | <i>Z.</i>            |       |
| 140 | 1, 4-cineol                                          | C <sub>10</sub> H <sub>16</sub>                | 136.13 | <i>corallinum</i>    | [83]  |
|     |                                                      |                                                |        | <i>Hance</i>         |       |
|     |                                                      |                                                |        | <i>Z. officinale</i> | [80]  |
|     |                                                      |                                                |        | <i>Z.</i>            |       |
| 141 | cis-β-terpineol                                      | C <sub>10</sub> H <sub>18</sub> O              | 154.14 | <i>corallinum</i>    | [95]  |
|     |                                                      |                                                |        | <i>Hance</i>         |       |
|     |                                                      |                                                |        | <i>Z.</i>            |       |
| 142 | α-terpinene                                          | C <sub>10</sub> H <sub>16</sub>                | 136.13 | <i>corallinum</i>    | [83]  |
|     |                                                      |                                                |        | <i>Hance</i>         |       |
|     |                                                      |                                                |        | <i>Z.</i>            |       |
|     |                                                      |                                                |        | <i>striolatum</i>    | [84]  |
|     |                                                      |                                                |        | <i>Diels</i>         |       |
|     |                                                      |                                                |        | <i>Z. mioga</i>      | [82]  |
|     |                                                      |                                                |        | <i>Z.</i>            |       |
| 143 | p-menth-2,8-dienol                                   | C <sub>10</sub> H <sub>16</sub> O              | 152.12 | <i>striolatum</i>    | [84]  |
|     |                                                      |                                                |        | <i>Diels</i>         |       |
| 144 | Phellandral                                          | C <sub>10</sub> H <sub>16</sub> O              | 152.12 | <i>Z. mioga</i>      | [82]  |
|     |                                                      |                                                |        | <i>Z.</i>            |       |
| 145 | 2-cyclohexen-1-ol, 1-methyl-4-(1-methylethyl)-, cis- | C <sub>10</sub> H <sub>18</sub> O              | 154.14 | <i>corallinum</i>    | [78]  |
|     |                                                      |                                                |        | <i>Hance</i>         |       |
|     |                                                      |                                                |        | <i>Z.</i>            |       |
|     |                                                      |                                                |        | <i>striolatum</i>    | [84]  |
|     |                                                      |                                                |        | <i>Diels</i>         |       |
|     |                                                      |                                                |        | <i>Z. mioga</i>      | [82]  |
| 146 | α-phellandrene                                       | C <sub>10</sub> H <sub>16</sub>                | 136.13 | <i>Z. zerumbet</i>   | [7]   |
|     |                                                      |                                                |        | <i>Z.</i>            |       |
|     |                                                      |                                                |        | <i>corallinum</i>    | [83]  |
|     |                                                      |                                                |        | <i>Hance</i>         |       |
|     |                                                      |                                                |        | <i>Z.</i>            |       |
|     |                                                      |                                                |        | <i>striolatum</i>    | [84]  |
|     |                                                      |                                                |        | <i>Diels</i>         |       |
|     |                                                      |                                                |        | <i>Z. officinale</i> | [81]  |
|     |                                                      |                                                |        | <i>Z. mioga</i>      | [82]  |
| 147 | γ-terpinene                                          | C <sub>10</sub> H <sub>16</sub>                | 136.13 | <i>Z. zerumbet</i>   | [7]   |
|     |                                                      |                                                |        | <i>Z.</i>            |       |
|     |                                                      |                                                |        | <i>corallinum</i>    | [78]  |
|     |                                                      |                                                |        | <i>Hance</i>         |       |
|     |                                                      |                                                |        | <i>Z.</i>            |       |
|     |                                                      |                                                |        | <i>striolatum</i>    | [84]  |
|     |                                                      |                                                |        | <i>Diels</i>         |       |
|     |                                                      |                                                |        | <i>Z. officinale</i> | [102] |
|     |                                                      |                                                |        | <i>Z. mioga</i>      | [82]  |
| 148 | Fenchone                                             | C <sub>10</sub> H <sub>16</sub> O              | 152.12 | <i>Z. zerumbet</i>   | [77]  |
|     |                                                      |                                                |        | <i>Z. mioga</i>      | [82]  |
| 149 | Camphene                                             | C <sub>10</sub> H <sub>16</sub>                | 136.13 | <i>Z. zerumbet</i>   | [77]  |
|     |                                                      |                                                |        | <i>Z.</i>            |       |
|     |                                                      |                                                |        | <i>corallinum</i>    | [95]  |
|     |                                                      |                                                |        | <i>Hance</i>         |       |

|     |                                |                                                |        |                                |      |
|-----|--------------------------------|------------------------------------------------|--------|--------------------------------|------|
|     |                                |                                                |        | <i>Z.</i><br><i>striolatum</i> | [84] |
|     |                                |                                                |        | <i>Diels</i>                   |      |
|     |                                |                                                |        | <i>Z. officinale</i>           | [81] |
|     |                                |                                                |        | <i>Z. mioga</i>                | [82] |
| 150 | Tricyclene                     | C <sub>10</sub> H <sub>18</sub>                | 138.14 | <i>Z. zerumbet</i>             | [7]  |
|     |                                |                                                |        | <i>Z. officinale</i>           | [81] |
|     |                                |                                                |        | <i>Z.</i>                      |      |
| 151 | β-fenchene                     | C <sub>10</sub> H <sub>16</sub>                | 136.13 | <i>corallinum</i>              | [94] |
|     |                                |                                                |        | <i>Hance</i>                   |      |
|     |                                |                                                |        | <i>Z. mioga</i>                | [82] |
| 152 | Linalool                       | C <sub>10</sub> H <sub>18</sub> O              | 154.14 | <i>Z. zerumbet</i>             | [77] |
|     |                                |                                                |        | <i>Z.</i>                      |      |
|     |                                |                                                |        | <i>corallinum</i>              | [83] |
|     |                                |                                                |        | <i>Hance</i>                   |      |
|     |                                |                                                |        | <i>Z.</i>                      |      |
|     |                                |                                                |        | <i>striolatum</i>              | [84] |
|     |                                |                                                |        | <i>Diels</i>                   |      |
|     |                                |                                                |        | <i>Z. officinale</i>           | [80] |
|     |                                |                                                |        | <i>Z. mioga</i>                | [82] |
| 153 | Borneol                        | C <sub>10</sub> H <sub>18</sub> O              | 154.14 | <i>Z. zerumbet</i>             | [77] |
|     |                                |                                                |        | <i>Z.</i>                      |      |
|     |                                |                                                |        | <i>striolatum</i>              | [84] |
|     |                                |                                                |        | <i>Diels</i>                   |      |
|     |                                |                                                |        | <i>Z. officinale</i>           | [81] |
|     |                                |                                                |        | <i>Z. mioga</i>                | [82] |
| 154 | α-terpineol                    | C <sub>10</sub> H <sub>18</sub> O              | 154.14 | <i>Z. zerumbet</i>             | [77] |
|     |                                |                                                |        | <i>Z.</i>                      |      |
|     |                                |                                                |        | <i>corallinum</i>              | [78] |
|     |                                |                                                |        | <i>Hance</i>                   |      |
|     |                                |                                                |        | <i>Z. officinale</i>           | [81] |
|     |                                |                                                |        | <i>Z. mioga</i>                | [82] |
| 155 | α-fenchene                     | C <sub>10</sub> H <sub>16</sub>                | 136.13 | <i>Z. mioga</i>                | [82] |
| 156 | 1,8-cineole                    | C <sub>10</sub> H <sub>18</sub> O              | 154.14 | <i>Z. zerumbet</i>             | [77] |
|     |                                |                                                |        | <i>Z. officinale</i>           | [81] |
| 157 | 2-carene                       | C <sub>10</sub> H <sub>16</sub>                | 136.13 | <i>Z. officinale</i>           | [79] |
|     |                                |                                                |        | <i>Z.</i>                      |      |
| 158 | Carene-4                       | C <sub>10</sub> H <sub>16</sub>                | 136.13 | <i>corallinum</i>              | [83] |
|     |                                |                                                |        | <i>Hance</i>                   |      |
|     |                                |                                                |        | <i>Z. officinale</i>           | [79] |
|     |                                |                                                |        | <i>Z.</i>                      |      |
| 159 | Ascaridole epoxide             | C <sub>10</sub> H <sub>16</sub> O <sub>2</sub> | 168.12 | <i>corallinum</i>              | [78] |
|     |                                |                                                |        | <i>Hance</i>                   |      |
|     |                                |                                                |        | <i>Z.</i>                      |      |
| 160 | Caran-2-ol                     | C <sub>10</sub> H <sub>18</sub> O              | 154.14 | <i>corallinum</i>              | [94] |
|     |                                |                                                |        | <i>Hance</i>                   |      |
| 161 | Limonene 1,2-epoxide           | C <sub>10</sub> H <sub>16</sub> O              | 152.12 | <i>Z. officinale</i>           | [80] |
| 162 | Neral                          | C <sub>10</sub> H <sub>16</sub> O              | 152.12 | <i>Z. zerumbet</i>             | [81] |
|     |                                |                                                |        | <i>Z. officinale</i>           | [81] |
| 163 | Nerol                          | C <sub>10</sub> H <sub>18</sub> O              | 154.14 | <i>Z. officinale</i>           | [24] |
| 164 | cis-2,6-Dimethyl-2,6-octadiene | C <sub>10</sub> H <sub>18</sub>                | 138.14 | <i>Z. officinale</i>           | [24] |
| 165 | Geranic acid                   | C <sub>10</sub> H <sub>16</sub> O <sub>2</sub> | 168.12 | <i>Z. officinale</i>           | [24] |
| 166 | Neryl propionate               | C <sub>13</sub> H <sub>22</sub> O <sub>2</sub> | 210.16 | <i>Z. officinale</i>           | [24] |
| 167 | Neryl acetate                  | C <sub>12</sub> H <sub>20</sub> O <sub>2</sub> | 196.15 | <i>Z. officinale</i>           | [24] |
| 168 | Citronellal                    | C <sub>10</sub> H <sub>18</sub> O              | 154.14 | <i>Z. zerumbet</i>             | [87] |
|     |                                |                                                |        | <i>Z. officinale</i>           | [81] |
| 169 | Citronellyl acetate            | C <sub>12</sub> H <sub>22</sub> O <sub>2</sub> | 198.16 | <i>Z. zerumbet</i>             | [87] |



|     |                  |                                   |        |                      |       |
|-----|------------------|-----------------------------------|--------|----------------------|-------|
|     |                  |                                   |        | <i>Z. officinale</i> | [88]  |
|     |                  |                                   |        | <i>Z. officinale</i> | [81]  |
| 170 | Citronellol      | C <sub>10</sub> H <sub>20</sub> O | 156.15 | <i>Z. officinale</i> | [81]  |
| 171 | β-myrcene        | C <sub>10</sub> H <sub>16</sub>   | 136.13 | <i>Z. zerumbet</i>   | [7]   |
|     |                  |                                   |        | <i>Z.</i>            |       |
|     |                  |                                   |        | <i>corallinum</i>    | [83]  |
|     |                  |                                   |        | <i>Hance</i>         |       |
|     |                  |                                   |        | <i>Z.</i>            |       |
|     |                  |                                   |        | <i>striolatum</i>    | [84]  |
|     |                  |                                   |        | <i>Diels</i>         |       |
|     |                  |                                   |        | <i>Z. officinale</i> | [81]  |
|     |                  |                                   |        | <i>Z. mioga</i>      | [82]  |
| 172 | Ocimene          | C <sub>10</sub> H <sub>16</sub>   | 136.13 | <i>Z. zerumbet</i>   | [92]  |
|     |                  |                                   |        | <i>Z.</i>            |       |
|     |                  |                                   |        | <i>striolatum</i>    | [84]  |
|     |                  |                                   |        | <i>Diels</i>         |       |
|     |                  |                                   |        | <i>Z. officinale</i> | [104] |
| 173 | Hotrienol        | C <sub>10</sub> H <sub>16</sub> O | 152.12 | <i>Z. officinale</i> | [86]  |
| 174 | Linalool         | C <sub>10</sub> H <sub>18</sub> O | 154.14 | <i>Z. zerumbet</i>   | [77]  |
|     |                  |                                   |        | <i>Z.</i>            |       |
|     |                  |                                   |        | <i>corallinum</i>    | [83]  |
|     |                  |                                   |        | <i>Hance</i>         |       |
|     |                  |                                   |        | <i>Z.</i>            |       |
|     |                  |                                   |        | <i>striolatum</i>    | [84]  |
|     |                  |                                   |        | <i>Diels</i>         |       |
|     |                  |                                   |        | <i>Z. officinale</i> | [80]  |
|     |                  |                                   |        | <i>Z. mioga</i>      | [82]  |
| 175 | Eucarvone        | C <sub>10</sub> H <sub>14</sub> O | 150.10 | <i>Z. mioga</i>      | [82]  |
|     |                  |                                   |        | <i>Z.</i>            |       |
| 176 | Sabinene hydrate | C <sub>10</sub> H <sub>18</sub> O | 154.14 | <i>corallinum</i>    | [83]  |
|     |                  |                                   |        | <i>Hance</i>         |       |
|     |                  |                                   |        | <i>Z.</i>            |       |
|     |                  |                                   |        | <i>striolatum</i>    | [84]  |
|     |                  |                                   |        | <i>Diels</i>         |       |
|     |                  |                                   |        | <i>Z. mioga</i>      | [82]  |
|     |                  |                                   |        | <i>Z.</i>            |       |
| 177 | α-thujene        | C <sub>10</sub> H <sub>14</sub> O | 136.13 | <i>corallinum</i>    | [83]  |
|     |                  |                                   |        | <i>Hance</i>         |       |
|     |                  |                                   |        | <i>Z.</i>            |       |
|     |                  |                                   |        | <i>striolatum</i>    | [84]  |
|     |                  |                                   |        | <i>Diels</i>         |       |
|     |                  |                                   |        | <i>Z. mioga</i>      | [82]  |
| 178 | β-thujene        | C <sub>10</sub> H <sub>16</sub>   | 136.13 | <i>Z. officinale</i> | [79]  |
| 179 | Sabinene         | C <sub>10</sub> H <sub>16</sub>   | 136.13 | <i>Z. zerumbet</i>   | [7]   |
|     |                  |                                   |        | <i>Z.</i>            |       |
|     |                  |                                   |        | <i>corallinum</i>    | [78]  |
|     |                  |                                   |        | <i>Hance</i>         |       |
|     |                  |                                   |        | <i>Z.</i>            |       |
|     |                  |                                   |        | <i>striolatum</i>    | [84]  |
|     |                  |                                   |        | <i>Diels</i>         |       |
|     |                  |                                   |        | <i>Z. officinale</i> | [81]  |
| 180 | Camphene hydrate | C <sub>10</sub> H <sub>18</sub> O | 154.14 | <i>Z. zerumbet</i>   | [77]  |
|     |                  |                                   |        | <i>Z.</i>            |       |
| 181 | Camphene oxide   | C <sub>10</sub> H <sub>16</sub> O | 152.12 | <i>corallinum</i>    | [83]  |
|     |                  |                                   |        | <i>Hance</i>         |       |
| 182 | β-pinene         | C <sub>10</sub> H <sub>16</sub>   | 136.13 | <i>Z. zerumbet</i>   | [77]  |

|                                                |                               |                                                |        |                  |       |
|------------------------------------------------|-------------------------------|------------------------------------------------|--------|------------------|-------|
|                                                |                               |                                                |        | Z.<br>corallinum | [78]  |
|                                                |                               |                                                |        | Hance            |       |
|                                                |                               |                                                |        | Z.<br>striolatum | [84]  |
|                                                |                               |                                                |        | Diels            |       |
|                                                |                               |                                                |        | Z. officinale    | [79]  |
|                                                |                               |                                                |        | Z. mioga         | [82]  |
| <b>Sesquiterpene, Diterpene and Triterpene</b> |                               |                                                |        |                  |       |
| 183                                            | $\gamma$ -selinene            | C <sub>15</sub> H <sub>24</sub>                | 204.19 | Z.<br>striolatum | [84]  |
|                                                |                               |                                                |        | Diels            |       |
| 184                                            | Eudesma-3,7(11)-diene         | C <sub>15</sub> H <sub>24</sub>                | 204.19 | Z. officinale    | [24]  |
| 185                                            | $\alpha$ -Cyperone            | C <sub>15</sub> H <sub>22</sub> O              | 218.17 | Z. zerumbet      | [105] |
|                                                |                               |                                                |        | Z. officinale    | [104] |
|                                                |                               |                                                |        | Z.               |       |
| 186                                            | $\beta$ -fenchene             | C <sub>10</sub> H <sub>16</sub>                | 136.13 | corallinum       | [94]  |
|                                                |                               |                                                |        | Hance            |       |
|                                                |                               |                                                |        | Z. mioga         | [82]  |
| 187                                            | $\alpha$ -fenchene            | C <sub>10</sub> H <sub>16</sub>                | 136.13 | Z. mioga         | [82]  |
|                                                |                               |                                                |        | Z.               |       |
| 188                                            | Farnesol                      | C <sub>14</sub> H <sub>24</sub> O              | 208.18 | corallinum       | [94]  |
|                                                |                               |                                                |        | Hance            |       |
|                                                |                               |                                                |        | Z. officinale    | [23]  |
|                                                |                               |                                                |        | Z. mioga         | [82]  |
| 189                                            | $\gamma$ -eudesmol            | C <sub>15</sub> H <sub>26</sub> O              | 220.20 | Z. zerumbet      | [91]  |
| 190                                            | $\beta$ -eudesmol             | C <sub>15</sub> H <sub>28</sub> O              | 224.21 | Z. zerumbet      | [77]  |
|                                                |                               |                                                |        | Z. officinale    | [79]  |
| 191                                            | $\alpha$ -eudesmol            | C <sub>15</sub> H <sub>26</sub> O              | 220.20 | Z. zerumbet      | [91]  |
|                                                |                               |                                                |        | Z.               |       |
| 192                                            | Isolongifolene                | C <sub>15</sub> H <sub>24</sub>                | 204.19 | corallinum       | [78]  |
|                                                |                               |                                                |        | Hance            |       |
| 193                                            | $\alpha$ -muurolene           | C <sub>15</sub> H <sub>24</sub>                | 204.19 | Z. zerumbet      | [91]  |
| 194                                            | $\delta$ -cadinene            | C <sub>15</sub> H <sub>24</sub>                | 204.19 | Z. zerumbet      | [7]   |
|                                                |                               |                                                |        | Z. officinale    | [79]  |
| 195                                            | $\beta$ -cadinene             | C <sub>15</sub> H <sub>24</sub>                | 204.19 | Z. officinale    | [80]  |
| 196                                            | $\gamma$ -cadinene            | C <sub>15</sub> H <sub>24</sub>                | 204.19 | Z. zerumbet      | [91]  |
|                                                |                               |                                                |        | Z. officinale    | [23]  |
|                                                |                               |                                                |        | Z. mioga         | [82]  |
| 197                                            | epi-bicyclosquiphellandrene   | C <sub>15</sub> H <sub>24</sub>                | 204.19 | Z. zerumbet      | [87]  |
| 198                                            | Miogadial                     | C <sub>20</sub> H <sub>30</sub> O <sub>3</sub> | 318.22 | Z. mioga         | [25]  |
| 199                                            | $\gamma$ -bicyclohomofarnesal | C <sub>17</sub> H <sub>30</sub> O              | 250.23 | Z. zerumbet      | [77]  |
| 200                                            | epi- $\alpha$ -cadinol        | C <sub>15</sub> H <sub>26</sub> O              | 220.20 | Z. zerumbet      | [85]  |
| 201                                            | Juniper camphor               | C <sub>15</sub> H <sub>26</sub> O              | 222.20 | Z. mioga         | [82]  |
| 202                                            | $\alpha$ -cedrene             | C <sub>15</sub> H <sub>24</sub>                | 204.19 | Z. zerumbet      | [87]  |
|                                                |                               |                                                |        | Z. officinale    | [79]  |
| 203                                            | $\beta$ -himachalene          | C <sub>15</sub> H <sub>24</sub>                | 204.19 | Z. mioga         | [82]  |
|                                                |                               |                                                |        | Z.               |       |
| 204                                            | $\gamma$ -gurjunene           | C <sub>15</sub> H <sub>24</sub>                | 190.17 | corallinum       | [78]  |
|                                                |                               |                                                |        | Hance            |       |
| 205                                            | Alloaromadendrene             | C <sub>15</sub> H <sub>24</sub>                | 204.19 | Z. officinale    | [23]  |
| 206                                            | Spathulenol                   | C <sub>15</sub> H <sub>24</sub> O              | 220.18 | Z. zerumbet      | [85]  |
|                                                |                               |                                                |        | Z.               |       |
|                                                |                               |                                                |        | striolatum       | [84]  |
|                                                |                               |                                                |        | Diels            |       |
|                                                |                               |                                                |        | Z. officinale    | [86]  |

|     |                                                                                     |                                                |        |               |       |
|-----|-------------------------------------------------------------------------------------|------------------------------------------------|--------|---------------|-------|
| 207 | Palustrol(ledum)                                                                    | C <sub>15</sub> H <sub>26</sub> O              | 222.20 | Z. officinale | [80]  |
| 208 | Dehydro-aromadendrene                                                               | C <sub>15</sub> H <sub>22</sub>                | 202.17 | Z. zerumbet   | [87]  |
| 209 | α-gurjunene                                                                         | C <sub>15</sub> H <sub>24</sub>                | 204.19 | Z. zerumbet   | [7]   |
|     |                                                                                     |                                                |        | Z.            |       |
|     |                                                                                     |                                                |        | striolatum    | [84]  |
|     |                                                                                     |                                                |        | Diels         |       |
|     |                                                                                     |                                                |        | Z. officinale | [79]  |
|     |                                                                                     |                                                |        | Z. mioga      | [82]  |
| 210 | Isofuranogermacrene                                                                 | C <sub>15</sub> H <sub>20</sub> O              | 216.15 | Z. officinale | [80]  |
| 211 | α-guaiene                                                                           | C <sub>15</sub> H <sub>24</sub>                | 204.19 | Z. officinale | [81]  |
|     |                                                                                     |                                                |        | Z. mioga      | [82]  |
| 212 | Champacol                                                                           | C <sub>15</sub> H <sub>26</sub> O              | 222.20 | Z. officinale | [86]  |
| 213 | (1aR,4R,7R,7bS)-1,1,4,7-tetramethyl-1a,2,3,4,5,6,7,7b-octahydrocyclopropa[e]azulene | C <sub>15</sub> H <sub>24</sub>                | 204.19 | Z. officinale | [107] |
| 214 | Ledane                                                                              | C <sub>15</sub> H <sub>26</sub>                | 206.20 | Z. mioga      | [82]  |
| 215 | Curcumadiol                                                                         | C <sub>15</sub> H <sub>26</sub> O <sub>2</sub> | 238.19 | Z. mioga      | [112] |
| 216 | β-patchoulene                                                                       | C <sub>15</sub> H <sub>24</sub>                | 204.19 | Z. officinale | [79]  |
|     |                                                                                     |                                                |        | Z. mioga      | [82]  |
| 217 | α-patchoulene                                                                       | C <sub>15</sub> H <sub>24</sub>                | 204.19 | Z. officinale | [81]  |
| 218 | Widdrol                                                                             | C <sub>15</sub> H <sub>26</sub> O              | 222.20 | Z. mioga      | [82]  |
| 219 | α-zingiberene                                                                       | C <sub>15</sub> H <sub>24</sub>                | 204.19 | Z. zerumbet   | [87]  |
|     |                                                                                     |                                                |        | Z. officinale | [81]  |
|     |                                                                                     |                                                |        | Z. mioga      | [82]  |
| 220 | α-copaene                                                                           | C <sub>15</sub> H <sub>24</sub>                | 204.19 | Z. zerumbet   | [7]   |
|     |                                                                                     |                                                |        | Z.            |       |
|     |                                                                                     |                                                |        | striolatum    | [84]  |
|     |                                                                                     |                                                |        | Diels         |       |
|     |                                                                                     |                                                |        | Z. officinale | [88]  |
|     |                                                                                     |                                                |        | Z.            |       |
| 221 | γ-elemene                                                                           | C <sub>15</sub> H <sub>24</sub>                | 204.19 | corallinum    | [93]  |
|     |                                                                                     |                                                |        | Hance         |       |
|     |                                                                                     |                                                |        | Z. officinale | [86]  |
| 222 | g-elemene                                                                           | C <sub>15</sub> H <sub>24</sub>                | 204.19 | Z. zerumbet   | [87]  |
| 223 | Cedrenol                                                                            | C <sub>15</sub> H <sub>24</sub> O              | 220.18 | Z. officinale | [80]  |
| 224 | ar-curcumene                                                                        | C <sub>15</sub> H <sub>22</sub>                | 202.17 | Z. zerumbet   | [87]  |
|     |                                                                                     |                                                |        | Z.            |       |
|     |                                                                                     |                                                |        | corallinum    | [78]  |
|     |                                                                                     |                                                |        | Hance         |       |
|     |                                                                                     |                                                |        | Z. officinale | [81]  |
|     |                                                                                     |                                                |        | Z. mioga      | [82]  |
|     |                                                                                     |                                                |        | Z.            |       |
| 225 | β-sesquiphellandrene                                                                | C <sub>15</sub> H <sub>24</sub>                | 204.19 | corallinum    | [93]  |
|     |                                                                                     |                                                |        | Hance         |       |
|     |                                                                                     |                                                |        | Z. mioga      | [82]  |
| 226 | (E, E)-α-farnesene                                                                  | C <sub>15</sub> H <sub>24</sub>                | 204.19 | Z. zerumbet   | [87]  |
|     |                                                                                     |                                                |        | Z.            |       |
|     |                                                                                     |                                                |        | corallinum    | [94]  |
|     |                                                                                     |                                                |        | Hance         |       |
|     |                                                                                     |                                                |        | Z. officinale | [23]  |
|     |                                                                                     |                                                |        | Z.            |       |
| 227 | c-β-farnesene                                                                       | C <sub>15</sub> H <sub>24</sub>                | 204.19 | corallinum    | [83]  |
|     |                                                                                     |                                                |        | Hance         |       |
|     |                                                                                     |                                                |        | Z. officinale | [23]  |
|     |                                                                                     |                                                |        | Z. mioga      | [82]  |
|     |                                                                                     |                                                |        | Z.            |       |
| 228 | Farnesol                                                                            | C <sub>14</sub> H <sub>24</sub> O              | 208.18 | corallinum    | [94]  |
|     |                                                                                     |                                                |        | Hance         |       |

|     |                                  |                                                |        |                      |       |
|-----|----------------------------------|------------------------------------------------|--------|----------------------|-------|
|     |                                  |                                                |        | <i>Z. officinale</i> | [23]  |
|     |                                  |                                                |        | <i>Z. mioga</i>      | [82]  |
| 229 | Farnesal                         | C <sub>15</sub> H <sub>24</sub> O              | 220.18 | <i>Z. officinale</i> | [109] |
| 230 | Farnesyl acetate                 | C <sub>17</sub> H <sub>28</sub> O <sub>2</sub> | 264.21 | <i>Z. officinale</i> | [90]  |
| 231 | Geranyl linalool                 | C <sub>20</sub> H <sub>34</sub> O              | 290.26 | <i>Z. officinale</i> | [86]  |
| 232 | D-nerolidol                      | C <sub>16</sub> H <sub>30</sub> O              | 224.21 | <i>Z. zerumbet</i>   | [7]   |
| 233 | Nerolidol                        | C <sub>16</sub> H <sub>28</sub> O              | 236.21 | <i>Z. zerumbet</i>   | [91]  |
|     |                                  |                                                |        | <i>Z. officinale</i> | [81]  |
| 234 | 2,5-dihydroxybisabola-3,10-diene | C <sub>15</sub> H <sub>26</sub> O <sub>2</sub> | 238.19 | <i>Z. officinale</i> | [6]   |
| 235 | 4,5-dihydroxybisabola-2,10-diene | C <sub>15</sub> H <sub>26</sub> O <sub>2</sub> | 238.19 | <i>Z. officinale</i> | [111] |
| 236 | Sesquisabinene hydrate           | C <sub>15</sub> H <sub>26</sub> O              | 222.20 | <i>Z. officinale</i> | [23]  |
| 237 | Agarospinol                      | C <sub>15</sub> H <sub>26</sub> O              | 222.20 | <i>Z. mioga</i>      | [82]  |
| 238 | α-panasinsene                    | C <sub>15</sub> H <sub>24</sub>                | 204.19 | <i>Z. officinale</i> | [89]  |
| 239 | β-panasinsene                    | C <sub>15</sub> H <sub>24</sub>                | 204.19 | <i>Z. officinale</i> | [89]  |
| 240 | Patchouli alcohol                | C <sub>15</sub> H <sub>26</sub> O              | 222.20 | <i>Z. officinale</i> | [81]  |
| 241 | Neoclovene                       | C <sub>15</sub> H <sub>24</sub>                | 204.19 | <i>Z. officinale</i> | [24]  |
| 242 | Germacrene D                     | C <sub>15</sub> H <sub>24</sub>                | 204.19 | <i>Z. zerumbet</i>   | [87]  |
|     |                                  |                                                |        | <i>Z. officinale</i> | [79]  |
|     |                                  |                                                |        | <i>Z.</i>            |       |
| 243 | Germacrene B                     | C <sub>15</sub> H <sub>24</sub>                | 204.19 | <i>corallinum</i>    | [93]  |
|     |                                  |                                                |        | <i>Hance</i>         |       |
|     |                                  |                                                |        | <i>Z.</i>            |       |
| 244 | β-cubebene                       | C <sub>15</sub> H <sub>24</sub>                | 204.19 | <i>striolatum</i>    | [84]  |
|     |                                  |                                                |        | <i>Diels</i>         |       |
|     |                                  |                                                |        | <i>Z.</i>            |       |
| 245 | (+)-cuparene                     | C <sub>15</sub> H <sub>22</sub>                | 202.17 | <i>corallinum</i>    | [78]  |
|     |                                  |                                                |        | <i>Hance</i>         |       |
| 246 | α-cuparenol                      | C <sub>15</sub> H <sub>22</sub> O              | 218.17 | <i>Z. officinale</i> | [80]  |
| 247 | α-caryophyllene                  | C <sub>15</sub> H <sub>24</sub>                | 204.19 | <i>Z. zerumbet</i>   | [92]  |
|     |                                  |                                                |        | <i>Z.</i>            |       |
|     |                                  |                                                |        | <i>striolatum</i>    | [84]  |
|     |                                  |                                                |        | <i>Diels</i>         |       |
| 248 | α-humulene                       | C <sub>15</sub> H <sub>24</sub>                | 204.19 | <i>Z. zerumbet</i>   | [77]  |
| 249 | β-humulene                       | C <sub>15</sub> H <sub>24</sub>                | 204.19 | <i>Z. officinale</i> | [108] |
| 250 | β-caryophyllene                  | C <sub>15</sub> H <sub>24</sub>                | 204.19 | <i>Z. zerumbet</i>   | [77]  |
|     |                                  |                                                |        | <i>Z.</i>            |       |
|     |                                  |                                                |        | <i>corallinum</i>    | [93]  |
|     |                                  |                                                |        | <i>Hance</i>         |       |
|     |                                  |                                                |        | <i>Z. officinale</i> | [81]  |
| 251 | Elemol                           | C <sub>15</sub> H <sub>26</sub> O              | 222.20 | <i>Z. zerumbet</i>   | [91]  |
|     |                                  |                                                |        | <i>Z. officinale</i> | [81]  |
|     |                                  |                                                |        | <i>Z. mioga</i>      | [82]  |
| 252 | Humulene epoxide I               | C <sub>15</sub> H <sub>24</sub> O              | 220.18 | <i>Z. zerumbet</i>   | [77]  |
| 253 | Humulene epoxide II              | C <sub>15</sub> H <sub>24</sub> O              | 220.18 | <i>Z. zerumbet</i>   | [77]  |
|     |                                  |                                                |        | <i>Z.</i>            |       |
|     |                                  |                                                |        | <i>striolatum</i>    | [84]  |
|     |                                  |                                                |        | <i>Diels</i>         |       |
| 254 | Humulene epoxide III             | C <sub>15</sub> H <sub>24</sub> O              | 220.18 | <i>Z. zerumbet</i>   | [77]  |
| 255 | Caryophyllene oxide              | C <sub>15</sub> H <sub>24</sub> O              | 220.18 | <i>Z. zerumbet</i>   | [77]  |
|     |                                  |                                                |        | <i>Z.</i>            |       |
|     |                                  |                                                |        | <i>striolatum</i>    | [84]  |
|     |                                  |                                                |        | <i>Diels</i>         |       |
|     |                                  |                                                |        | <i>Z. officinale</i> | [20]  |
|     |                                  |                                                |        | <i>Z. mioga</i>      | [82]  |
| 256 | (E)-β-bergamotene                | C <sub>15</sub> H <sub>24</sub>                | 204.19 | <i>Z. zerumbet</i>   | [87]  |
|     |                                  |                                                |        | <i>Z. mioga</i>      | [82]  |

|                   |                                                                |                                                 |        |                                         |               |
|-------------------|----------------------------------------------------------------|-------------------------------------------------|--------|-----------------------------------------|---------------|
| 257               | 1,5,5,8-tetramethyl-12-oxabicyclo 9.1.0-dodeca-3,7-diene       | C <sub>15</sub> H <sub>24</sub> O               | 220.18 | <i>Z. mioga</i>                         | [82]          |
| 258               | $\alpha$ -bisabolol                                            | C <sub>15</sub> H <sub>26</sub> O               | 222.20 | <i>Z. officinale</i>                    | [86]          |
| 259               | Squalene                                                       | C <sub>30</sub> H <sub>50</sub>                 | 410.39 | <i>Z. officinale</i><br><i>Z. mioga</i> | [106]<br>[82] |
| 260               | Galanal A                                                      | C <sub>20</sub> H <sub>30</sub> O <sub>3</sub>  | 318.22 | <i>Z. mioga</i>                         | [113]         |
| 261               | Galanal B                                                      | C <sub>20</sub> H <sub>30</sub> O <sub>3</sub>  | 318.22 | <i>Z. mioga</i>                         | [113]         |
| <b>Flavonoids</b> |                                                                |                                                 |        |                                         |               |
| 262               | Kaempferol-3,4',7-O-trimethylether                             | C <sub>18</sub> H <sub>16</sub> O <sub>6</sub>  | 328.09 | <i>Z. zerumbet</i>                      | [114]         |
| 263               | Kaempferol-3-O-methylether                                     | C <sub>16</sub> H <sub>12</sub> O <sub>6</sub>  | 300.06 | <i>Z. zerumbet</i>                      | [114]         |
| 264               | Kaempferol-3,4'-O-dimethylether                                | C <sub>17</sub> H <sub>14</sub> O <sub>6</sub>  | 314.08 | <i>Z. zerumbet</i>                      | [114]         |
| 265               | Kaempferol-3-O-(4-O-acetyl-(x-L-rhamnopyranoside))             | C <sub>23</sub> H <sub>22</sub> O <sub>11</sub> | 474.12 | <i>Z. zerumbet</i>                      | [114]         |
| 266               | Kaempferol-3-O-(2,4-O-diacetyl-cz-L-rhamnopyranoside)          | C <sub>25</sub> H <sub>24</sub> O <sub>12</sub> | 516.13 | <i>Z. zerumbet</i>                      | [114]         |
| 267               | Kaempferol-3-O-(3,4-O-diacetyl-- $\alpha$ -L-rhamnopyranoside) | C <sub>25</sub> H <sub>24</sub> O <sub>12</sub> | 516.13 | <i>Z. zerumbet</i>                      | [114]         |
| 268               | Quercetin-deoxyhexose- hexose                                  | C <sub>27</sub> H <sub>30</sub> O <sub>16</sub> | 610.15 | <i>Z. striolatum</i><br><i>Diels</i>    | [54]          |
| 269               | Quercetin-di-O-galloyl- hexose                                 | C <sub>35</sub> H <sub>28</sub> O <sub>20</sub> | 768.12 | <i>Z. striolatum</i><br><i>Diels</i>    | [54]          |
| 270               | Kaempferol-acetyl-deoxyhexose- hexose                          | C <sub>29</sub> H <sub>32</sub> O <sub>16</sub> | 636.17 | <i>Z. striolatum</i><br><i>Diels</i>    | [54]          |
| 271               | Kaempferol-deoxyhexose- hexose                                 | C <sub>27</sub> H <sub>30</sub> O <sub>15</sub> | 594.16 | <i>Z. striolatum</i><br><i>Diels</i>    | [54]          |
| 272               | Dihydrokaempferol                                              | C <sub>15</sub> H <sub>12</sub> O <sub>6</sub>  | 288.06 | <i>Z. striolatum</i><br><i>Diels</i>    | [54]          |
| 273               | Kaempferol-galloyl- hexose                                     | C <sub>28</sub> H <sub>24</sub> O <sub>15</sub> | 600.11 | <i>Z. striolatum</i><br><i>Diels</i>    | [54]          |
| 274               | Quercetin-acetyl-deoxyhexose- hexose                           | C <sub>29</sub> H <sub>32</sub> O <sub>17</sub> | 652.16 | <i>Z. striolatum</i><br><i>Diels</i>    | [54]          |
| 275               | Methyl-quercetin-OCH <sub>3</sub>                              | C <sub>17</sub> H <sub>14</sub> O <sub>7</sub>  | 330.07 | <i>Z. striolatum</i><br><i>Diels</i>    | [54]          |
| 276               | Kaempferol-deoxyhexose                                         | C <sub>21</sub> H <sub>20</sub> O <sub>10</sub> | 432.11 | <i>Z. striolatum</i><br><i>Diels</i>    | [54]          |
| 277               | Methyl-quercetin-2OCH <sub>3</sub>                             | C <sub>18</sub> H <sub>16</sub> O <sub>7</sub>  | 344.09 | <i>Z. striolatum</i><br><i>Diels</i>    | [54]          |
| 278               | Kaempferol-pentose                                             | C <sub>20</sub> H <sub>18</sub> O <sub>10</sub> | 418.09 | <i>Z. striolatum</i><br><i>Diels</i>    | [54]          |
| 279               | Quercetin-galloyl-pentose                                      | C <sub>27</sub> H <sub>22</sub> O <sub>15</sub> | 586.10 | <i>Z. striolatum</i><br><i>Diels</i>    | [54]          |
| 280               | 7,4'-dihydroxyflavanone                                        | C <sub>15</sub> H <sub>10</sub> O <sub>4</sub>  | 254.06 | <i>Z. striolatum</i><br><i>Diels</i>    | [54]          |

|                         |                                                                                                |                                                 |        |                                                        |               |
|-------------------------|------------------------------------------------------------------------------------------------|-------------------------------------------------|--------|--------------------------------------------------------|---------------|
| 281                     | Quercetin-O-pentose                                                                            | C <sub>20</sub> H <sub>18</sub> O <sub>11</sub> | 434.08 | Z.<br><i>striolatum</i><br>Diels                       | [54]          |
| 282                     | Quercetin-galloyl- hexose                                                                      | C <sub>28</sub> H <sub>24</sub> O <sub>16</sub> | 616.11 | Z.<br><i>striolatum</i><br>Diels                       | [54]          |
| 283                     | 5, 3'-di-OH-isoflavone                                                                         | C <sub>15</sub> H <sub>10</sub> O <sub>4</sub>  | 254.06 | Z.<br><i>striolatum</i><br>Diels                       | [54]          |
| 284                     | Kaempferol-galloyl-pentose                                                                     | C <sub>27</sub> H <sub>22</sub> O <sub>14</sub> | 570.10 | Z.<br><i>striolatum</i><br>Diels                       | [54]          |
| 285                     | Kaempferol-di-O-galloyl- hexose                                                                | C <sub>35</sub> H <sub>28</sub> O <sub>19</sub> | 752.12 | Z.<br><i>striolatum</i><br>Diels                       | [54]          |
| 286                     | Quercetin                                                                                      | C <sub>15</sub> H <sub>10</sub> O <sub>7</sub>  | 302.04 | Z.<br><i>striolatum</i><br>Diels                       | [54]          |
| 287                     | Methyl-quercetin                                                                               | C <sub>16</sub> H <sub>12</sub> O <sub>7</sub>  | 316.06 | Z.<br><i>striolatum</i><br>Diels                       | [54]          |
| 288                     | Kaempferol                                                                                     | C <sub>15</sub> H <sub>10</sub> O <sub>6</sub>  | 286.05 | Z.<br><i>striolatum</i><br>Diels                       | [54]          |
| 289                     | 5-hydro-3,7,3',4'-tetra methoxyflavone                                                         | C <sub>19</sub> H <sub>18</sub> O <sub>7</sub>  | 358.11 | Z. <i>officinale</i>                                   | [115]         |
| 290                     | Galangin                                                                                       | C <sub>15</sub> H <sub>11</sub> O <sub>7</sub>  | 303.05 | Z. <i>mioga</i>                                        | [112]         |
| 291                     | Rutin                                                                                          | C <sub>27</sub> H <sub>30</sub> O <sub>16</sub> | 580.15 | Z. <i>mioga</i>                                        | [112]         |
| 292                     | Delphinidin                                                                                    | C <sub>15</sub> H <sub>10</sub> O <sub>5</sub>  | 270.05 | Z. <i>mioga</i>                                        | [112]         |
| 293                     | Cyanidin                                                                                       | C <sub>15</sub> H <sub>11</sub> O <sub>6</sub>  | 287.06 | Z. <i>mioga</i>                                        | [112]         |
| <b>Diphenylheptanes</b> |                                                                                                |                                                 |        |                                                        |               |
| 294                     | Curcumin                                                                                       | C <sub>21</sub> H <sub>20</sub> O <sub>6</sub>  | 368.13 | Z. <i>zerumbet</i><br>Z.<br><i>corallinum</i><br>Hance | [116]<br>[94] |
| 295                     | Hexahydrocurcumin                                                                              | C <sub>21</sub> H <sub>26</sub> O <sub>6</sub>  | 374.17 | Z. <i>officinale</i>                                   | [117]         |
| 296                     | 3-one-5(R)-ethoxy-1-(3-methoxy-4-hydroxyphenyl)-<br>7-(3-methoxy-4,5-dihydroxy-phenyl) heptane | C <sub>23</sub> H <sub>30</sub> O <sub>7</sub>  | 418.20 | Z. <i>officinale</i>                                   | [101]         |
| 297                     | 3-one-5(R)-ethoxy-1-(3-methoxy-4-hydroxyphenyl)-<br>7-(3,4-dihydroxy-phenyl) heptane           | C <sub>22</sub> H <sub>28</sub> O <sub>6</sub>  | 388.19 | Z. <i>officinale</i>                                   | [101]         |
| 298                     | (E)-7-(4-hydroxyphenyl)-1-heptphenyl-4-en-3-one                                                | C <sub>19</sub> H <sub>20</sub> O <sub>2</sub>  | 280.15 | Z. <i>officinale</i>                                   | [115]         |
| 299                     | 7-(3,4-dihydroxy-phenyl)-5-hydroxy-1-phenyl-3-<br>heptanone                                    | C <sub>19</sub> H <sub>22</sub> O <sub>4</sub>  | 314.15 | Z. <i>officinale</i>                                   | [115]         |
| 300                     | 7-(3,4-dihydroxy-5-methoxyphenyl)-5-hydroxy-1-<br>phenyl-3-heptanone                           | C <sub>20</sub> H <sub>24</sub> O <sub>5</sub>  | 344.16 | Z. <i>officinale</i>                                   | [115]         |
| 301                     | 7-(3,4-dihydroxy-5-methoxy-phenyl)-5-hydroxy-1-<br>(4-hydroxy-3-methoxyphenyl)-3-heptanone     | C <sub>21</sub> H <sub>26</sub> O <sub>7</sub>  | 390.17 | Z. <i>officinale</i>                                   | [115]         |
| 302                     | 7-(3,4-dihydroxy-5-methoxyphenyl)-5-hydroxy-1-<br>(4-hydroxy-3-methoxyphenyl)heptan-3-one      | C <sub>21</sub> H <sub>26</sub> O <sub>7</sub>  | 390.17 | Z. <i>officinale</i>                                   | [41]          |
| 303                     | 1-(4-Hydroxy-3-methoxy-phenyl)-7-(3-hydroxy-4-<br>methoxy-phenyl)-3,5-heptanediol              | C <sub>21</sub> H <sub>28</sub> O <sub>6</sub>  | 376.19 | Z. <i>officinale</i>                                   | [115]         |
| 304                     | 1,7-bis(4-hydroxy-3-methoxyphenyl)heptane-3,5-<br>diol                                         | C <sub>21</sub> H <sub>28</sub> O <sub>6</sub>  | 376.19 | Z. <i>officinale</i>                                   | [41]          |
| 305                     | (E)-5-hydroxy-1,7-di-phenylhept-6-en-3-one                                                     | C <sub>19</sub> H <sub>20</sub> O <sub>2</sub>  | 280.15 | Z. <i>officinale</i>                                   | [115]         |
| 306                     | (4Z,6E)-5-hydroxy-1,7-diphenylhepta-4,6-dien-3-<br>one                                         | C <sub>19</sub> H <sub>18</sub> O <sub>2</sub>  | 278.13 | Z. <i>officinale</i>                                   | [115]         |
| 307                     | 7-(4-hydroxy-3-methoxyphenyl)-1-(4-<br>hydroxyphenyl)-5-methoxy-3-heptanone                    | C <sub>21</sub> H <sub>26</sub> O <sub>5</sub>  | 358.18 | Z. <i>officinale</i>                                   | [115]         |

|                           |                                                                                                                      |                                                     |        |                                                           |                |
|---------------------------|----------------------------------------------------------------------------------------------------------------------|-----------------------------------------------------|--------|-----------------------------------------------------------|----------------|
| 308                       | 7-(4-hydroxy-3-methoxyphenyl)-1-(4-hydroxy-phenyl)-3-heptanone                                                       | C <sub>20</sub> H <sub>24</sub> O <sub>4</sub>      | 328.17 | <i>Z. officinale</i>                                      | [115]          |
| 309                       | 1,7-bis(4-hydroxyphenyl)-3-heptanone                                                                                 | C <sub>19</sub> H <sub>22</sub> O <sub>3</sub>      | 298.16 | <i>Z. officinale</i>                                      | [115]          |
| 310                       | (E)-7-(3,4-Dihydroxyphenyl)-1-(4-hydro-3-methoxyphenyl)-4-hepten-3-one                                               | C <sub>20</sub> H <sub>22</sub> O <sub>5</sub>      | 342.15 | <i>Z. officinale</i>                                      | [115]          |
| 311                       | Gingerenone A                                                                                                        | C <sub>21</sub> H <sub>24</sub> O <sub>5</sub>      | 356.16 | <i>Z. officinale</i><br><i>Z. mioga</i>                   | [41]<br>[112]  |
| 312                       | 1-(4-hydro-3-methoxyphenyl)-7-phenyl-3,5-heptanedione                                                                | C <sub>20</sub> H <sub>22</sub> O <sub>4</sub>      | 326.15 | <i>Z. officinale</i>                                      | [115]          |
| 313                       | 3,5-dioxo-1,7-bis(3-methoxy-4-hydroxy)-phenyl-heptane                                                                | C <sub>21</sub> H <sub>24</sub> O <sub>6</sub>      | 370.18 | <i>Z. officinale</i>                                      | [41]           |
| 314                       | 3,5-diacetoxy-1-(3-methoxy-4,5-dihydroxy-phenyl)-7-(4-hydroxy-3-methoxyphenyl)heptane                                | C <sub>25</sub> H <sub>32</sub> O <sub>9</sub>      | 476.20 | <i>Z. officinale</i>                                      | [41]           |
| 315                       | 5-(6-(2-(3,4-dihydroxy-5-methoxyphenyl)-2-methoxyethyl)-4-hydroxytetrahydro-2-hpyran-2-yl)-3-methoxybenzene-1,2-diol | C <sub>22</sub> H <sub>28</sub> O <sub>9</sub>      | 464.20 | <i>Z. officinale</i>                                      | [111]          |
| 316                       | 5-(6-(3,4-dihydroxyphenethyl)-4-hydroxytetrahydro-2-hpyran-2-yl)-3-methoxybenzene-1,2-diol                           | C <sub>20</sub> H <sub>24</sub> O <sub>7</sub>      | 376.15 | <i>Z. officinale</i>                                      | [111]          |
| 317                       | 5-(4-hydroxy-6-(4-dihydroxyphenethyl)tetrahydro-2-hpyran-2-yl)-3-methoxybenzene-1,2-diol                             | C <sub>20</sub> H <sub>24</sub> O <sub>6</sub>      | 360.16 | <i>Z. officinale</i>                                      | [111]          |
| 318                       | 5-(4-hydroxy-6-(4-dihydroxyphenethyl)tetrahydro-2-hpyran-2-yl)-3-methoxybenzene-1,2-diol                             | C <sub>21</sub> H <sub>26</sub> O <sub>7</sub>      | 390.17 | <i>Z. officinale</i>                                      | [111]          |
| 319                       | 1,5-epoxy-3-hydroxy-1-(3,4-hydroxy-5-methoxyphenyl)-7-(4-hydroxy-3-methoxyphenyl)heptane                             | C <sub>21</sub> H <sub>26</sub> O <sub>7</sub>      | 390.17 | <i>Z. officinale</i>                                      | [41]           |
| 320                       | 5-[4-hydroxy-6-(4-hydroxyphenethyl)tetrahydro-2H-pyran-2-yl]-3-methoxybenzene-1,2-dio                                | C <sub>20</sub> H <sub>24</sub> O <sub>6</sub>      | 360.16 | <i>Z. officinale</i>                                      | [41]           |
| <b>Gingerol analogues</b> |                                                                                                                      |                                                     |        |                                                           |                |
| 321                       | Dihydrocapsaicin                                                                                                     | C <sub>18</sub> H <sub>29</sub> N<br>O <sub>3</sub> | 307.21 | <i>Z. officinale</i>                                      | [86]           |
| 322                       | Zingerone                                                                                                            | C <sub>11</sub> H <sub>14</sub> O <sub>3</sub>      | 194.09 | <i>corallinum</i><br><i>Hance</i><br><i>Z. officinale</i> | [94]<br>[86]   |
| 323                       | 2-gingerol                                                                                                           | C <sub>13</sub> H <sub>18</sub> O <sub>4</sub>      | 238.12 | <i>Z. officinale</i>                                      | [115]          |
| 324                       | 4-gingerol                                                                                                           | C <sub>15</sub> H <sub>22</sub> O <sub>4</sub>      | 266.15 | <i>Z. officinale</i>                                      | [115]          |
| 325                       | 6-gingerol                                                                                                           | C <sub>17</sub> H <sub>26</sub> O <sub>4</sub>      | 294.18 | <i>Z. officinale</i>                                      | [115]          |
| 326                       | 8-gingerol                                                                                                           | C <sub>19</sub> H <sub>30</sub> O <sub>4</sub>      | 322.21 | <i>Z. officinale</i>                                      | [115]          |
| 327                       | 10-gingerol                                                                                                          | C <sub>21</sub> H <sub>34</sub> O <sub>4</sub>      | 350.25 | <i>Z. officinale</i>                                      | [115]          |
| 328                       | 12-gingerol                                                                                                          | C <sub>23</sub> H <sub>38</sub> O <sub>4</sub>      | 378.28 | <i>Z. officinale</i>                                      | [115]          |
| 329                       | 6-gingerdiol                                                                                                         | C <sub>17</sub> H <sub>28</sub> O <sub>4</sub>      | 296.20 | <i>Z. officinale</i><br><i>Z. mioga</i>                   | [115]<br>[112] |
| 330                       | 8-gingerdiol                                                                                                         | C <sub>19</sub> H <sub>32</sub> O <sub>4</sub>      | 324.23 | <i>Z. officinale</i>                                      | [115]          |
| 331                       | 10-gingerdiol                                                                                                        | C <sub>21</sub> H <sub>36</sub> O <sub>4</sub>      | 352.26 | <i>Z. officinale</i>                                      | [115]          |
| 332                       | 4-shogaol                                                                                                            | C <sub>15</sub> H <sub>20</sub> O <sub>3</sub>      | 248.14 | <i>Z. officinale</i>                                      | [115]          |
| 333                       | 6-shogaol                                                                                                            | C <sub>17</sub> H <sub>24</sub> O <sub>3</sub>      | 276.17 | <i>Z. officinale</i>                                      | [115]          |
| 334                       | 8-shogaol                                                                                                            | C <sub>19</sub> H <sub>28</sub> O <sub>3</sub>      | 304.20 | <i>Z. officinale</i>                                      | [115]          |
| 335                       | 10-shogaol                                                                                                           | C <sub>21</sub> H <sub>32</sub> O <sub>3</sub>      | 332.24 | <i>Z. officinale</i>                                      | [115]          |
| 336                       | 12-shogaol                                                                                                           | C <sub>23</sub> H <sub>36</sub> O <sub>3</sub>      | 360.27 | <i>Z. officinale</i>                                      | [115]          |
| 337                       | Methyl-6-shogaol                                                                                                     | C <sub>18</sub> H <sub>26</sub> O <sub>3</sub>      | 290.19 | <i>Z. officinale</i>                                      | [118]          |
| 338                       | 6-hydroxyl-6-shogaol                                                                                                 | C <sub>17</sub> H <sub>24</sub> O <sub>4</sub>      | 292.17 | <i>Z. officinale</i>                                      | [115]          |
| 339                       | Methyl-6-gingerol                                                                                                    | C <sub>18</sub> H <sub>28</sub> O <sub>4</sub>      | 308.20 | <i>Z. officinale</i>                                      | [115]          |
| 340                       | Methyl-8-gingerol                                                                                                    | C <sub>20</sub> H <sub>32</sub> O <sub>4</sub>      | 336.23 | <i>Z. officinale</i>                                      | [115]          |
| 341                       | Methyl-10-gingerol                                                                                                   | C <sub>22</sub> H <sub>36</sub> O <sub>4</sub>      | 364.26 | <i>Z. officinale</i>                                      | [115]          |
| 342                       | Methyl-6-gingerdiol                                                                                                  | C <sub>18</sub> H <sub>30</sub> O <sub>4</sub>      | 310.21 | <i>Z. officinale</i>                                      | [115]          |
| 343                       | Acetoxy-8-gingerol                                                                                                   | C <sub>21</sub> H <sub>32</sub> O <sub>5</sub>      | 364.22 | <i>Z. officinale</i>                                      | [115]          |

|                      |                                               |                                                     |        |                                            |                       |
|----------------------|-----------------------------------------------|-----------------------------------------------------|--------|--------------------------------------------|-----------------------|
| 344                  | Acetoxy-10-gingerol                           | C <sub>23</sub> H <sub>36</sub> O <sub>5</sub>      | 392.26 | Z. officinale                              | [115]                 |
| 345                  | Methylacetoxy-6-gingerol                      | C <sub>20</sub> H <sub>30</sub> O <sub>5</sub>      | 350.21 | Z. officinale                              | [115]                 |
| 346                  | 3-Acetoxy-6-gingerdiol                        | C <sub>19</sub> H <sub>30</sub> O <sub>5</sub>      | 338.21 | Z. officinale                              | [115]                 |
| 347                  | 5-Acetoxy-7-gingerdiol                        | C <sub>20</sub> H <sub>32</sub> O <sub>5</sub>      | 352.22 | Z. officinale                              | [118]                 |
| 348                  | Methyl diacetoxy-4-gingerdiol                 | C <sub>20</sub> H <sub>30</sub> O <sub>6</sub>      | 366.20 | Z. officinale                              | [118]                 |
| 349                  | Methyl-3-acetoxy-6-gingerdiol                 | C <sub>20</sub> H <sub>32</sub> O <sub>5</sub>      | 352.22 | Z. officinale                              | [115]                 |
| 350                  | Methyldiacetoxy-6-gingerdiol                  | C <sub>22</sub> H <sub>34</sub> O <sub>6</sub>      | 394.24 | Z. officinale                              | [115]                 |
| 351                  | Diacetoxy-8-gingerdiol                        | C <sub>23</sub> H <sub>36</sub> O <sub>6</sub>      | 408.25 | Z. officinale                              | [115]                 |
| 352                  | 6-gingerdione                                 | C <sub>17</sub> H <sub>24</sub> O <sub>4</sub>      | 292.17 | Z. officinale                              | [119]                 |
| 353                  | 8-gingerdione                                 | C <sub>19</sub> H <sub>28</sub> O <sub>4</sub>      | 320.20 | Z. officinale                              | [115]                 |
| 354                  | 10-gingerdione                                | C <sub>21</sub> H <sub>32</sub> O <sub>4</sub>      | 348.23 | Z. officinale                              | [115]                 |
| 355                  | 6-paradol                                     | C <sub>17</sub> H <sub>26</sub> O <sub>3</sub>      | 278.19 | Z. officinale                              | [115]                 |
| 356                  | 7-paradol                                     | C <sub>18</sub> H <sub>29</sub> O <sub>3</sub>      | 292.20 | Z. officinale                              | [118]                 |
| 357                  | 6-dehydrogingerdione                          | C <sub>17</sub> H <sub>22</sub> O <sub>4</sub>      | 290.15 | Z. officinale                              | [115]                 |
| 358                  | 8-dehydrogingerdione                          | C <sub>19</sub> H <sub>26</sub> O <sub>4</sub>      | 318.18 | Z. officinale                              | [115]                 |
| 359                  | 10-dehydrogingerdione                         | C <sub>21</sub> H <sub>30</sub> O <sub>4</sub>      | 346.21 | Z. officinale                              | [115]                 |
| 360                  | 12-dehydrogingerdione                         | C <sub>23</sub> H <sub>34</sub> O <sub>4</sub>      | 374.25 | Z. officinale                              | [115]                 |
| 361                  | Geranjferu licacid                            | C <sub>20</sub> H <sub>26</sub> O <sub>4</sub>      | 330.18 | Z. officinale                              | [119]                 |
| 362                  | 8-isodehydro gingerdione                      | C <sub>19</sub> H <sub>26</sub> O <sub>4</sub>      | 318.18 | Z. officinale                              | [119]                 |
| 363                  | 6-isodehydro gingerdione                      | C <sub>17</sub> H <sub>22</sub> O <sub>4</sub>      | 290.15 | Z. officinale                              | [119]                 |
| 364                  | 1-(4-hydroxy-3-methoxyphenyl)-3-tetradecanone | C <sub>21</sub> H <sub>34</sub> O <sub>3</sub>      | 334.25 | Z. officinale                              | [119]                 |
| 365                  | 6-gingesulfonic acid                          | C <sub>17</sub> H <sub>26</sub> O <sub>6</sub><br>S | 358.15 | Z. officinale                              | [119]                 |
| 366                  | 8-gingesulfonic acid                          | C <sub>19</sub> H <sub>30</sub> O <sub>6</sub><br>S | 386.18 | Z. officinale                              | [119]                 |
| 367                  | 10-gingesulfonic acid                         | C <sub>21</sub> H <sub>34</sub> O <sub>6</sub><br>S | 414.21 | Z. officinale                              | [119]                 |
| <b>Organic acids</b> |                                               |                                                     |        |                                            |                       |
| 368                  | 4-hydroxybenzoic acid                         | C <sub>7</sub> H <sub>6</sub> O <sub>3</sub>        | 138.03 | Z.<br>striolatum<br>Diels                  | [121]                 |
| 369                  | 3-hydroxy-4-methoxybenzoic acid               | C <sub>8</sub> H <sub>8</sub> O <sub>4</sub>        | 168.04 | Z.<br>striolatum<br>Diels                  | [121]                 |
| 370                  | Linoleic acid                                 | C <sub>17</sub> H <sub>30</sub> O <sub>2</sub>      | 282.22 | Z.<br>striolatum<br>Diels<br>Z. officinale | [23]<br>[86]          |
| 371                  | (E)-16-methylheptadec-2-enoic acid            | C <sub>18</sub> H <sub>34</sub> O <sub>2</sub>      | 282.26 | Z.<br>striolatum<br>Diels                  | [122]                 |
| 372                  | α-linolenic acid                              | C <sub>18</sub> H <sub>30</sub> O <sub>2</sub>      | 278.22 | Z. officinale<br>Z. mioga                  | [23]<br>[86]<br>[112] |
| 373                  | Glycosmistic acid                             | C <sub>20</sub> H <sub>20</sub> O <sub>7</sub>      | 372.12 | Z. officinale                              | [99]                  |
| 374                  | (3,4-Dimethoxyphenyl) Acetic Acid             | C <sub>10</sub> H <sub>12</sub> O <sub>4</sub>      | 196.07 | Z. officinale                              | [99]                  |
| 375                  | (2Z,6Z)-2,6-dimethylocta-2,6-dienedioic acid  | C <sub>10</sub> H <sub>14</sub> O <sub>4</sub>      | 198.09 | Z. officinale                              | [99]                  |
| 376                  | Isovaleric acid                               | C <sub>5</sub> H <sub>10</sub> O <sub>2</sub>       | 102.07 | Z. officinale                              | [88]                  |
| 377                  | Hexanoic acid                                 | C <sub>6</sub> H <sub>11</sub> O <sub>2</sub>       | 116.08 | Z. officinale                              | [88]                  |
| 378                  | Tetracosanoic acid                            | C <sub>24</sub> H <sub>48</sub> O <sub>2</sub>      | 368.37 | Z. officinale                              | [117]                 |
| 379                  | Melissic acid                                 | C <sub>30</sub> H <sub>60</sub> O <sub>2</sub>      | 452.46 | Z. officinale                              | [117]                 |
| 380                  | 9,12-octadecadienoic acid                     | C <sub>18</sub> H <sub>32</sub> O <sub>2</sub>      | 280.24 | Z. officinale                              | [60]                  |
| 381                  | 3-acetamidobenzoic acid                       | C <sub>9</sub> H <sub>9</sub> NO <sub>3</sub>       | 179.06 | Z. officinale                              | [60]                  |
| 382                  | Dihydrophaseic acid                           | C <sub>13</sub> H <sub>18</sub> O <sub>6</sub>      | 270.11 | Z. officinale                              | [123]                 |
| 383                  | 4-hydroxy-3,5-dimethoxybenzoic acid           | C <sub>9</sub> H <sub>10</sub> O <sub>5</sub>       | 198.05 | Z. officinale                              | [119]                 |
| 384                  | 3-(4-hydroxy-3-methoxyphenyl)propanoic acid   | C <sub>10</sub> H <sub>12</sub> O <sub>4</sub>      | 196.07 | Z. officinale                              | [119]                 |
| 385                  | p-hydroxybenzene propanoic acid               | C <sub>9</sub> H <sub>10</sub> O <sub>3</sub>       | 166.06 | Z. officinale                              | [119]                 |



|                 |                                                    |                                                               |        |                                                                                                      |                            |
|-----------------|----------------------------------------------------|---------------------------------------------------------------|--------|------------------------------------------------------------------------------------------------------|----------------------------|
| 386             | Pinocarveyl acetate trans-                         | C <sub>12</sub> H <sub>18</sub> O <sub>2</sub>                | 194.13 | <i>Z. mioga</i>                                                                                      | [82]                       |
| 387             | Propanoic acid                                     | C <sub>3</sub> H <sub>6</sub> O <sub>2</sub>                  | 74.04  | <i>Z. mioga</i>                                                                                      | [112]                      |
| 388             | Glutaric acid                                      | C <sub>5</sub> H <sub>8</sub> O <sub>4</sub>                  | 132.04 | <i>Z. mioga</i>                                                                                      | [112]                      |
| 389             | Ethylmalonic acid                                  | C <sub>4</sub> H <sub>6</sub> O <sub>4</sub>                  | 118.03 | <i>Z. mioga</i>                                                                                      | [112]                      |
| 390             | Citric acid                                        | C <sub>7</sub> H <sub>10</sub> O <sub>7</sub>                 | 206.04 | <i>Z. mioga</i>                                                                                      | [112]                      |
| 391             | Phenylalanine                                      | C <sub>9</sub> H <sub>11</sub> NO <sub>2</sub>                | 165.08 | <i>Z. mioga</i>                                                                                      | [112]                      |
| 392             | 2-(Methylamino)benzoic acid                        | C <sub>8</sub> H <sub>9</sub> NO <sub>2</sub>                 | 151.06 | <i>Z. mioga</i>                                                                                      | [112]                      |
| 393             | Tryptophan                                         | C <sub>11</sub> H <sub>12</sub> N <sub>2</sub> O <sub>2</sub> | 204.09 | <i>Z. mioga</i>                                                                                      | [112]                      |
| 394             | Oxalic acid                                        | C <sub>2</sub> H <sub>2</sub> O <sub>4</sub>                  | 90.03  | <i>Z. officinale</i>                                                                                 | [30]                       |
| 395             | Tartaric acids                                     | C <sub>4</sub> H <sub>6</sub> O <sub>6</sub>                  | 150.02 | <i>Z. officinale</i>                                                                                 | [30]                       |
| <b>Sterides</b> |                                                    |                                                               |        |                                                                                                      |                            |
| 396             | Daucosterol                                        | C <sub>35</sub> H <sub>60</sub> O <sub>6</sub>                | 576.44 | <i>Z. corallinum</i><br><i>Hance</i><br><i>Z. striolatum</i><br><i>Diels</i><br><i>Z. officinale</i> | [94]<br><br>[124]<br>[118] |
| 397             | β-sitosterol                                       | C <sub>30</sub> H <sub>52</sub> O                             | 428.40 | <i>Z. striolatum</i><br><i>Diels</i><br><i>Z. officinale</i>                                         | [124]<br><br>[118]         |
| <b>Others</b>   |                                                    |                                                               |        |                                                                                                      |                            |
| 398             | 4-(4-hydroxy-3-methoxyphenyl)but-3-en-2-one        | C <sub>11</sub> H <sub>12</sub> O <sub>3</sub>                | 192.08 | <i>Z. officinale</i>                                                                                 | [100]                      |
| 399             | 1-(4-hydroxy-3-methoxyphenyl)ethanone              | C <sub>9</sub> H <sub>10</sub> O <sub>3</sub>                 | 166.06 | <i>Z. officinale</i>                                                                                 | [100]                      |
| 400             | 2,5-dibutylfuran                                   | C <sub>12</sub> H <sub>20</sub> O                             | 180.15 | <i>Z. officinale</i>                                                                                 | [60]                       |
| 401             | Tetrahydrofuran                                    | C <sub>4</sub> H <sub>8</sub> O                               | 72.06  | <i>Z. mioga</i>                                                                                      | [82]                       |
| 402             | Glycerol                                           | C <sub>3</sub> H <sub>8</sub> O <sub>3</sub>                  | 92.05  | <i>Z. mioga</i>                                                                                      | [112]                      |
| 403             | Hedycaryol                                         | C <sub>15</sub> H <sub>26</sub> O                             | 222.20 | <i>Z. zerumbet</i>                                                                                   | [7]                        |
| 404             | p-hydroxybenzaldehyde                              | C <sub>7</sub> H <sub>6</sub> O <sub>2</sub>                  | 122.04 | <i>Z. zerumbet</i><br><i>Z. officinale</i>                                                           | [114]<br>[125]             |
| 405             | Vanillin                                           | C <sub>8</sub> H <sub>8</sub> O <sub>3</sub>                  | 152.05 | <i>Z. zerumbet</i><br><i>Z. corallinum</i><br><i>Hance</i>                                           | [114]<br>[83]              |
| 406             | Zerumbone epoxide                                  | C <sub>16</sub> H <sub>24</sub> O <sub>2</sub>                | 348.18 | <i>Z. zerumbet</i><br><i>Z. striolatum</i><br><i>Diels</i><br><i>Z. striolatum</i><br><i>Diels</i>   | [126]<br>[124]             |
| 407             | Sucrose                                            | C <sub>12</sub> H <sub>22</sub> O <sub>11</sub>               | 334.12 | <i>Z. striolatum</i><br><i>Diels</i><br><i>Z. striolatum</i><br><i>Diels</i>                         | [124]<br>[121]             |
| 408             | α-tritiated thymidine                              | C <sub>5</sub> H <sub>5</sub> TN <sub>2</sub> O <sub>2</sub>  | 128.05 | <i>Z. striolatum</i><br><i>Diels</i><br><i>Z. striolatum</i><br><i>Diels</i>                         | [121]<br>[121]             |
| 409             | Uracil                                             | C <sub>4</sub> H <sub>4</sub> N <sub>2</sub> O <sub>2</sub>   | 112.03 | <i>Z. striolatum</i><br><i>Diels</i><br><i>Z. officinale</i>                                         | [121]<br>[117]             |
| 410             | Hexanal                                            | C <sub>6</sub> H <sub>12</sub> O                              | 100.09 | <i>Z. officinale</i>                                                                                 | [86]                       |
| 411             | Decane-2-dione                                     | C <sub>10</sub> H <sub>20</sub> O                             | 156.15 | <i>Z. officinale</i>                                                                                 | [86]                       |
| 412             | Undecanal                                          | C <sub>11</sub> H <sub>22</sub> O                             | 170.17 | <i>Z. officinale</i>                                                                                 | [86]                       |
| 413             | 3-undecyne                                         | C <sub>11</sub> H <sub>20</sub>                               | 152.16 | <i>Z. mioga</i>                                                                                      | [82]                       |
| 414             | 3,7,11,15-tetramethylhexadeca-1,3,6,10,14-pentaene | C <sub>20</sub> H <sub>32</sub>                               | 272.25 | <i>Z. officinale</i>                                                                                 | [86]                       |
| 415             | 3,3,6-trimethylhepta-4,5-diene-2-one               | C <sub>10</sub> H <sub>16</sub> O                             | 152.12 | <i>Z. officinale</i>                                                                                 | [86]                       |
| 416             | Citrylidenmalonsaeure                              | C <sub>12</sub> H <sub>16</sub> O <sub>4</sub>                | 224.10 | <i>Z. officinale</i>                                                                                 | [41]                       |
| 417             | 3-oxabicyclo[3.2.0]heptane-2,4-dione               | C <sub>6</sub> H <sub>6</sub> O <sub>3</sub>                  | 126.03 | <i>Z. officinale</i>                                                                                 | [118]                      |
| 418             | Indole-3-carboxaldehyde                            | C <sub>9</sub> H <sub>7</sub> NO                              | 145.05 | <i>Z. officinale</i>                                                                                 | [99]                       |

|     |                                                            |                                                |        |               |       |
|-----|------------------------------------------------------------|------------------------------------------------|--------|---------------|-------|
| 419 | (Z)-2,6-dimethylocta-6-diene-1,8-diol                      | C <sub>10</sub> H <sub>20</sub> O <sub>2</sub> | 172.15 | Z. officinale | [99]  |
| 420 | Acetal                                                     | C <sub>6</sub> H <sub>14</sub> O <sub>2</sub>  | 118.10 | Z. officinale | [88]  |
| 421 | Heptan-2-one                                               | C <sub>7</sub> H <sub>14</sub> O               | 114.10 | Z. officinale | [88]  |
| 422 | Heptaldehyde                                               | C <sub>7</sub> H <sub>14</sub> O               | 114.10 | Z. officinale | [88]  |
| 423 | Valeraldehyde propyleneglycol acetal 2                     | C <sub>8</sub> H <sub>16</sub> O <sub>2</sub>  | 144.12 | Z. officinale | [88]  |
| 424 | trans-2-heptenal                                           | C <sub>7</sub> H <sub>12</sub> O               | 112.09 | Z. officinale | [88]  |
| 425 | 2-ethylhexanol                                             | C <sub>8</sub> H <sub>18</sub> O               | 130.14 | Z. officinale | [88]  |
| 426 | 2-nonanol                                                  | C <sub>9</sub> H <sub>20</sub> O               | 144.15 | Z. officinale | [88]  |
| 427 | trans-2-decenal                                            | C <sub>10</sub> H <sub>18</sub> O              | 154.14 | Z. officinale | [88]  |
| 428 | 2-undecanol                                                | C <sub>11</sub> H <sub>24</sub> O              | 172.18 | Z. officinale | [88]  |
| 429 | (+)-isolariciresinol                                       | C <sub>20</sub> H <sub>24</sub> O <sub>6</sub> | 360.16 | Z. officinale | [100] |
| 430 | Ethyl 4'-hydroxy-3'-methoxycinnamate                       | C <sub>12</sub> H <sub>14</sub> O <sub>4</sub> | 222.09 | Z. officinale | [100] |
| 431 | (+)-pinoresinol                                            | C <sub>20</sub> H <sub>22</sub> O <sub>6</sub> | 358.14 | Z. officinale | [100] |
| 432 | 1-octen-3-ol                                               | C <sub>8</sub> H <sub>16</sub> O               | 128.12 | Z. mioga      | [82]  |
| 433 | bis(2-ethylOctyl) phthalate                                | C <sub>28</sub> H <sub>46</sub> O <sub>4</sub> | 446.34 | Z. officinale | [117] |
| 434 | 5-hydroxymethylfurfural                                    | C <sub>6</sub> H <sub>6</sub> O <sub>3</sub>   | 126.03 | Z. officinale | [117] |
| 435 | Isovanillin                                                | C <sub>8</sub> H <sub>8</sub> O <sub>3</sub>   | 152.05 | Z. officinale | [125] |
| 436 | Carinol                                                    | C <sub>20</sub> H <sub>26</sub> O <sub>7</sub> | 378.17 | Z. officinale | [60]  |
| 437 | 1,4-naphthoquinon                                          | C <sub>10</sub> H <sub>6</sub> O <sub>2</sub>  | 158.04 | Z. officinale | [60]  |
| 438 | 3,5,6-trihydroxy-7-megastigmen-9-one                       | C <sub>13</sub> H <sub>22</sub> O <sub>4</sub> | 242.15 | Z. officinale | [123] |
| 439 | 3-(3-hydroxybutyl)-2,4,4-trimethyl-2,5-cyclohexadien-1-one | C <sub>13</sub> H <sub>20</sub> O <sub>2</sub> | 208.15 | Z. officinale | [123] |
| 440 | Grasshopper ketone                                         | C <sub>13</sub> H <sub>20</sub> O <sub>3</sub> | 224.14 | Z. officinale | [123] |
| 441 | 1,3,6-tri-hydroxy-8-methyl-anthra-quinone                  | C <sub>15</sub> H <sub>10</sub> O <sub>5</sub> | 270.05 | Z. officinale | [119] |
| 442 | 3',5-diallylbiphenyl-2,4'-diol                             | C <sub>18</sub> H <sub>18</sub> O <sub>2</sub> | 266.13 | Z. officinale | [119] |
| 443 | Butylbenzene                                               | C <sub>10</sub> H <sub>14</sub>                | 134.11 | Z. mioga      | [82]  |
| 444 | 2-methylbutanal                                            | C <sub>5</sub> H <sub>10</sub> O               | 86.07  | Z. mioga      | [82]  |
| 445 | 3-hydroxy-2-butanone                                       | C <sub>4</sub> H <sub>8</sub> O <sub>2</sub>   | 88.05  | Z. mioga      | [82]  |
| 446 | 2-acetylcyclopentanone                                     | C <sub>7</sub> H <sub>10</sub> O <sub>2</sub>  | 126.07 | Z. mioga      | [82]  |
| 447 | D-Mannose                                                  | C <sub>6</sub> H <sub>12</sub> O <sub>6</sub>  | 180.06 | Z. mioga      | [112] |

**Table S2.** Antimicrobial effect of *Zingiber* plants.

| Extracts/Compounds                      | Microbes                                     | Inhibitory concentrations |              | Reference |       |
|-----------------------------------------|----------------------------------------------|---------------------------|--------------|-----------|-------|
|                                         |                                              | (µg/mL)                   |              |           |       |
| 10-gingerol                             | <i>P. gingivalis</i> ATCC 53978              | MIC: 6                    | MBC: 6       | [55]      |       |
|                                         | <i>Porphyromonas endodontalis</i> ATCC 35406 | MIC: 8                    | MBC: 4       |           |       |
|                                         | <i>P. intermedia</i> ATCC 25611              | MIC: 14                   | MBC: 14      |           |       |
|                                         | <i>Mycobacterium avium</i>                   | MIC: 25                   |              |           |       |
|                                         | <i>Mycobacterium tuberculosis</i>            | MIC: 50                   |              |           |       |
| 12-gingerol                             | <i>P. gingivalis</i> ATCC 53978              | MIC: 15                   | MBC: 10      |           |       |
|                                         | <i>Porphyromonas endodontalis</i> ATCC 35406 | MIC: 15                   | MBC: 10      |           |       |
|                                         | <i>P. intermedia</i> ATCC 25611              | MIC: 30                   | MBC: 20      |           |       |
| 6-gingerol                              | <i>Helicobacter pylori</i>                   | MIC: 20                   |              | [127]     |       |
| Zerumbone                               | <i>S. mutans</i> ATCC35668                   | MIC: 250                  | MBC: 500     | [54]      |       |
|                                         | <i>E. faecalis</i> ATCC 29212                | MIC: 250                  | MBC: 250     | [39]      |       |
|                                         | <i>E. faecalis</i> ATCC 29212                | MIC: 250                  | MBC: 250     |           |       |
|                                         | <i>E. faecalis</i> ATCC 29212                | MIC: 250                  | MBC: 250     |           |       |
|                                         | <i>E. faecalis</i> ATCC 29212                | MIC: 250                  | MBC: 250     |           |       |
|                                         | <i>E. faecalis</i> ATCC 29212                | MIC: 250                  | MBC: 250     |           |       |
|                                         | <i>E. faecalis</i> ATCC 29212                | MIC: 250                  | MBC: 250     |           |       |
|                                         | <i>E. faecalis</i> ATCC 29212                | MIC: 250                  | MBC: 250     |           |       |
|                                         | <i>E. faecalis</i> ATCC 29212                | MIC: 250                  | MBC: 250     |           |       |
|                                         | <i>H. pylori</i> NCTC11637                   | MIC: 250                  |              | [54]      |       |
|                                         | <i>H. pylori</i> J99                         | MIC: 250                  |              |           |       |
|                                         | <i>C. albicans</i> ATCC 14053                | MIC: 64                   |              | [53]      |       |
|                                         | <i>E. floccosum</i>                          | MIC: 8                    | MFC: 64      | [128]     |       |
|                                         | <i>M. canis</i>                              | MIC: 8                    | MFC: 64      |           |       |
|                                         | <i>M. gypseum</i>                            | MIC: 16                   | MFC: 128     |           |       |
|                                         | <i>T. rubrum</i>                             | MIC: 16                   | MFC: 128     |           |       |
| Z. zerumbet fresh rhizome essential oil | <i>E. faecalis</i> ATCC 29212                | MIC: 1250                 | MBC: 1250    |           |       |
|                                         | <i>S. aureus</i> ATCC 6538P                  | MIC: 78.13                | MBC: 156.25  |           |       |
|                                         | <i>B. subtilis</i> CMCC (B) 63501            | MIC: 78.13                | MBC: 156.25  |           |       |
|                                         | <i>P. aeruginosa</i> CMCC (B)10104           | MIC: 312.5                | MBC: 625.00  |           |       |
|                                         | <i>E. coli</i> ATCC 25922                    | MIC: 156.25               | MBC: 312.25  |           |       |
|                                         | <i>P. vulgaris</i> CMCC (B) 49027            | MIC: 78.13                | MBC: 156.25  |           |       |
|                                         | <i>C. albicans</i> CMCC (F) 98001            | MIC: 312.5                | MBC: 2500.0  |           |       |
|                                         | <i>E. faecalis</i> ATCC 29212                | MIC: 1250                 | MBC: 1250    |           |       |
|                                         | <i>S. aureus</i> ATCC 6538P                  | MIC: 156.25               | MBC: 156.25  |           |       |
|                                         | <i>B. subtilis</i> CMCC (B) 63501            | MIC: 156.25               | MBC: 312.50  |           |       |
| Z. zerumbet dry rhizome essential oil   | <i>P. aeruginosa</i> CMCC (B)10104           | MIC: 312.50               | MBC: 625.00  |           |       |
|                                         | <i>E. coli</i> ATCC 25922                    | MIC: 156.25               | MBC: 625.00  |           |       |
|                                         | <i>P. vulgaris</i> CMCC (B) 49027            | MIC: 156.25               | MBC: 312.50  |           |       |
|                                         | <i>C. albicans</i> CMCC (F) 98001            | MIC: 312.50               | MBC: 2500.00 |           |       |
|                                         | <i>Acinetobacter baumannii</i>               | MIC: 1457.81              | MBC: 1457.81 |           | [129] |
|                                         | <i>Rhizoctonia solani</i> Kühn               | EC <sub>50</sub> : 3.64   |              |           | [95]  |
|                                         | <i>Fusarium gram inearum</i>                 | EC <sub>50</sub> : 11.20  |              |           |       |
|                                         | <i>Fusarium nivale</i>                       | EC <sub>50</sub> : 11.33  |              |           |       |
|                                         | <i>Pyricularia oryzae</i>                    | EC <sub>50</sub> : 14.19  |              |           |       |
|                                         | <i>Trichophyton rubrum</i>                   | MIC: 0.3                  |              |           | [130] |
| Z. corallinum essential oil             | <i>Trichophyton Mentagrophytes</i>           | MIC: 0.5                  |              |           |       |
|                                         | <i>Trichophyton Rosaceum</i>                 | MIC: 0.5                  |              |           |       |
|                                         | <i>Trichoderma hirsutum</i>                  | MIC: 1                    |              |           |       |
|                                         | <i>Trichoderma flocculus</i>                 | MIC: 0.5                  |              |           |       |
|                                         | <i>Microsporum gypseum</i>                   | MIC: 1                    |              |           |       |
|                                         | <i>Microsporum ferrugineum</i>               | MIC: 1                    |              |           |       |
|                                         | <i>Microsporum lanosum</i>                   | MIC: 1                    |              |           |       |
|                                         |                                              |                           |              |           |       |

|           |                                              |          |      |
|-----------|----------------------------------------------|----------|------|
| Miogadial | <i>Candida Albicans</i>                      | MIC: 5   | [25] |
|           | <i>Cryptococcus neo formans</i>              | MIC: 2   |      |
|           | <i>Fonsecaea pedrosoi</i>                    | MIC: 2   |      |
|           | <i>Sporothrix schenckii</i>                  | MIC: 2   |      |
|           | <i>Bacillus cereus</i> ATCC 10702            | MIC: 25  |      |
|           | <i>Bacillus subtilis</i> ATCC 6633           | MIC: 25  |      |
|           | <i>Staphylococcus aureus</i> ATCC 12600      | MIC: 60  |      |
|           | <i>Staphylococcus aureus</i> ATCC 361        | MIC: 25  |      |
|           | <i>Staphylococcus epidermidis</i> ATCC 14990 | MIC: 25  |      |
|           | <i>Staphylococcus faecalis</i> RIMD 3116001  | MIC: 125 |      |
|           | <i>Candida albicans</i> NBRC 2091            | MIC: 50  |      |
|           | <i>Candida tropicalis</i> NBRC 66029         | MIC: 50  |      |
|           | <i>Candida glabata</i> NBRC 2001             | MIC: 100 |      |
|           | <i>Zygosaccharomyces rouxii</i> NBRC 28253   | MIC: 50  |      |
|           | <i>Saccharomyces cerevisiae</i> NBRC 2601    | MIC: 50  |      |
|           | <i>Aspergillus fumigatus</i> NBRC 7080       | MIC: 500 |      |
|           | <i>Penicillium frequentans</i> NBRC 7919     | MIC: 500 |      |
| Galanal A | <i>Bacillus cereus</i> ATCC 10702            | MIC: 200 |      |
|           | <i>Bacillus subtilis</i> ATCC 6633           | MIC: 500 |      |
|           | <i>Staphylococcus aureus</i> ATCC 12600      | MIC: 500 |      |
|           | <i>Staphylococcus aureus</i> ATCC 361        | MIC: 500 |      |
|           | <i>Staphylococcus epidermidis</i> ATCC 14990 | MIC: 500 |      |
|           | <i>Candida albicans</i> NBRC 2091            | MIC: 200 |      |
|           | <i>Candida tropicalis</i> NBRC 66029         | MIC: 200 |      |
|           | <i>Candida glabata</i> NBRC 2001             | MIC: 500 |      |
|           | <i>Zygosaccharomyces rouxii</i> NBRC 28253   | MIC: 200 |      |
|           | <i>Saccharomyces cerevisiae</i> NBRC 2601    | MIC: 200 |      |
| Galanal B | <i>Bacillus cereus</i> ATCC 10702            | MIC: 200 |      |
|           | <i>Bacillus subtilis</i> ATCC 6633           | MIC: 300 |      |
|           | <i>Staphylococcus aureus</i> ATCC 12600      | MIC: 500 |      |
|           | <i>Staphylococcus aureus</i> ATCC 361        | MIC: 300 |      |
|           | <i>Staphylococcus epidermidis</i> ATCC 14990 | MIC: 300 |      |
|           | <i>Candida albicans</i> NBRC 2091            | MIC: 200 |      |
|           | <i>Candida tropicalis</i> NBRC 66029         | MIC: 200 |      |
|           | <i>Candida glabata</i> NBRC 2001             | MIC: 500 |      |
|           | <i>Zygosaccharomyces rouxii</i> NBRC 28253   | MIC: 200 |      |
|           | <i>Saccharomyces cerevisiae</i> NBRC 2601    | MIC: 200 |      |

MFC: minimum fungicidal concentration; MIC: minimum inhibitory concentration; MBC: minimum bactericidal concentration; EC<sub>50</sub>: the half maximal effective concentration.

**Table S3.** Larvicidal effect of *Zingiber* plants.

| Extracts/Compounds                                     | Insects                       | Inhibitory concentrations<br>( $\mu\text{g/mL}$ ) |                          | References |
|--------------------------------------------------------|-------------------------------|---------------------------------------------------|--------------------------|------------|
| Methanol extract of <i>Z. zerumbet</i> rhizomes        | <i>Artemia salina</i>         | 24h: $\text{LC}_{50}$ =                           |                          | [57]       |
|                                                        |                               | 127.4                                             | $\text{LC}_{90}$ = 351.4 |            |
|                                                        |                               | 48h: $\text{LC}_{50}$ =                           | $\text{LC}_{90}$ = 195.6 |            |
|                                                        | <i>Aedes aegypti</i>          | 64.0                                              |                          |            |
|                                                        |                               | 48h: $\text{LC}_{50}$ =                           |                          |            |
|                                                        |                               | 293.2                                             | $\text{LC}_{90}$ = 471.6 |            |
|                                                        | <i>Anopheles nuneztovari</i>  | 72h: $\text{LC}_{50}$ =                           | $\text{LC}_{90}$ = 382.6 |            |
|                                                        |                               | 232.3                                             |                          |            |
|                                                        |                               | 48h: $\text{LC}_{50}$ =                           |                          |            |
| Dichloromethane extract of <i>Z. zerumbet</i> rhizomes | <i>Aedes aegypti</i>          | 73.9                                              | $\text{LC}_{90}$ = 227.9 | [56]       |
|                                                        |                               | 72h: $\text{LC}_{50}$ =                           | $\text{LC}_{90}$ = 210.5 |            |
|                                                        |                               | 68.1                                              |                          |            |
|                                                        | <i>Artemia salina</i>         | 24h: $\text{LC}_{50}$ =                           |                          |            |
|                                                        |                               | 40.4                                              | $\text{LC}_{90}$ = 177.7 |            |
|                                                        |                               | 48h: $\text{LC}_{50}$ =                           | $\text{LC}_{90}$ = 132.8 |            |
|                                                        | <i>Anopheles nuneztovari</i>  | 30.9                                              |                          |            |
|                                                        |                               | 48h: $\text{LC}_{50}$ =                           |                          |            |
|                                                        |                               | 89.8                                              | $\text{LC}_{90}$ = 170.5 |            |
| <i>Z. corallinum</i> essential oil                     | <i>Aedes albopictus</i>       | 72h: $\text{LC}_{50}$ =                           | $\text{LC}_{90}$ = 141.4 | [56]       |
|                                                        |                               | 68.2                                              |                          |            |
|                                                        | <i>Culex quinquefasciatus</i> | 48h: $\text{LC}_{50}$ =                           |                          |            |
|                                                        |                               | 62.8                                              | $\text{LC}_{90}$ = 206.4 |            |
|                                                        |                               | 72h: $\text{LC}_{50}$ =                           | $\text{LC}_{90}$ = 142.8 |            |
| <i>Z. corallinum</i> essential oil                     | <i>Aedes albopictus</i>       | 54.6                                              |                          | [56]       |
|                                                        |                               | 24h: $\text{LC}_{50}$ =                           |                          |            |
|                                                        |                               | 77.994                                            |                          |            |
| <i>Z. corallinum</i> essential oil                     | <i>Culex quinquefasciatus</i> | 24h: $\text{LC}_{50}$ =                           |                          | [56]       |
|                                                        |                               | 66.574                                            |                          |            |

$\text{LC}_{50}$ : lethal concentration 50%;  $\text{LC}_{90}$ : lethal concentration 90%.
